# Supplementary material
Source: HighWire-hosted journal article supplement (http://jpet.aspetjournals.org/highwire/filestream/139009/field_highwire_adjunct_files/0/237743Supplemental_Material.pdf)
Supplement: 237743Supplemental_Material.pdf [file 237743Supplemental_Material.pdf]

## Supplemental Material

### GS-5759, a Bifunctional $\beta_2$ -Adrenoceptor Agonist and Phosphodiesterase 4 Inhibitor for Chronic Obstructive Pulmonary Disease with a Unique Mode of Action: Effects on Gene Expression in Human Airway Epithelial Cells

Taruna Joshi, Dong Yan, Omar Hamed, Stacey L. Tannheimer, Gary B. Phillips, Musong Kim, Clifford D. Wright, Michael Salmon, Robert Newton & Mark A. Giembycz

*Departments of Physiology & Pharmacology (T.J., D.Y., O.H., M.A.G.) and Cell Biology & Anatomy (R.N.), Snyder Institute for Chronic Diseases, Cumming School of Medicine, University of Calgary, Calgary, Alberta, Canada and Translational Medicine, Biomarkers (S.L.T.), Inflammation Research (M.S., C.D.W.) and Medicinal Chemistry (M.H., G.B.P.), Gilead Sciences Inc., Seattle, Washington, USA.*

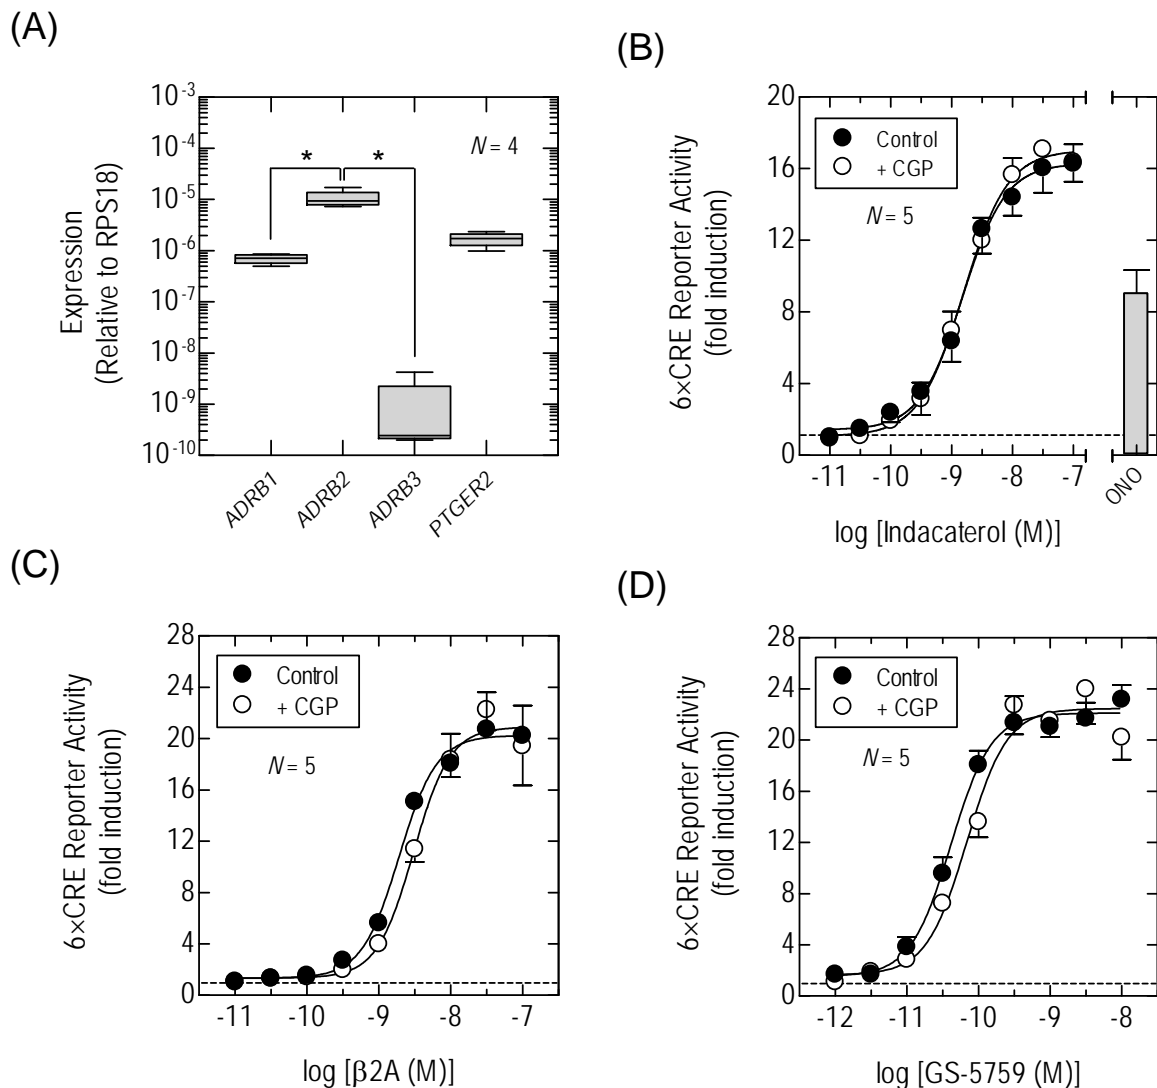

**Supplemental Fig. 1.**  $\beta$ -Adrenoceptor expression and function in BEAS-2B cells. Panel A. cDNA from untreated BEAS-2B cells was subjected to TaqMan PCR using a human GPCR array.  $\beta$ -Adrenoceptor mRNA transcripts, expressed as a ratio to *RPS18*, are presented as Box and Whisker plots in log<sub>10</sub> format and are compared to transcripts encoding the prostanoid EP<sub>2</sub>-receptor. Panels B-D. Effect of the selective  $\beta$ <sub>1</sub>-adrenoceptor antagonist, CGP 20712A (CGP), on indacaterol-,  $\beta$ 2A- and GS-5759-induced reporter activation. 6xCRE BEAS-2B reporter cells were treated with GS-5759,  $\beta$ 2A and indacaterol alone and after pre-treatment (30min) with CGP (500nM). GSK 256066 (10nM) was present throughout the GS-5759 experiments to eliminate the contribution that PDE4 inhibition could make to reporter activation. At 6h, cells were lysed, luciferase activity measured and  $E/[A]$  curves constructed. The effect of selective EP<sub>2</sub>-receptor agonist, ONO-AE1-259 (ONO; 1 $\mu$ M), is shown for comparison. The horizontal dashed lines represent baseline luciferase activity. In all panels, data represent the mean  $\pm$  s.e. mean of *N* independent observations. \**P* < 0.05, one-way ANOVA followed by Tukey's multiple comparison test.

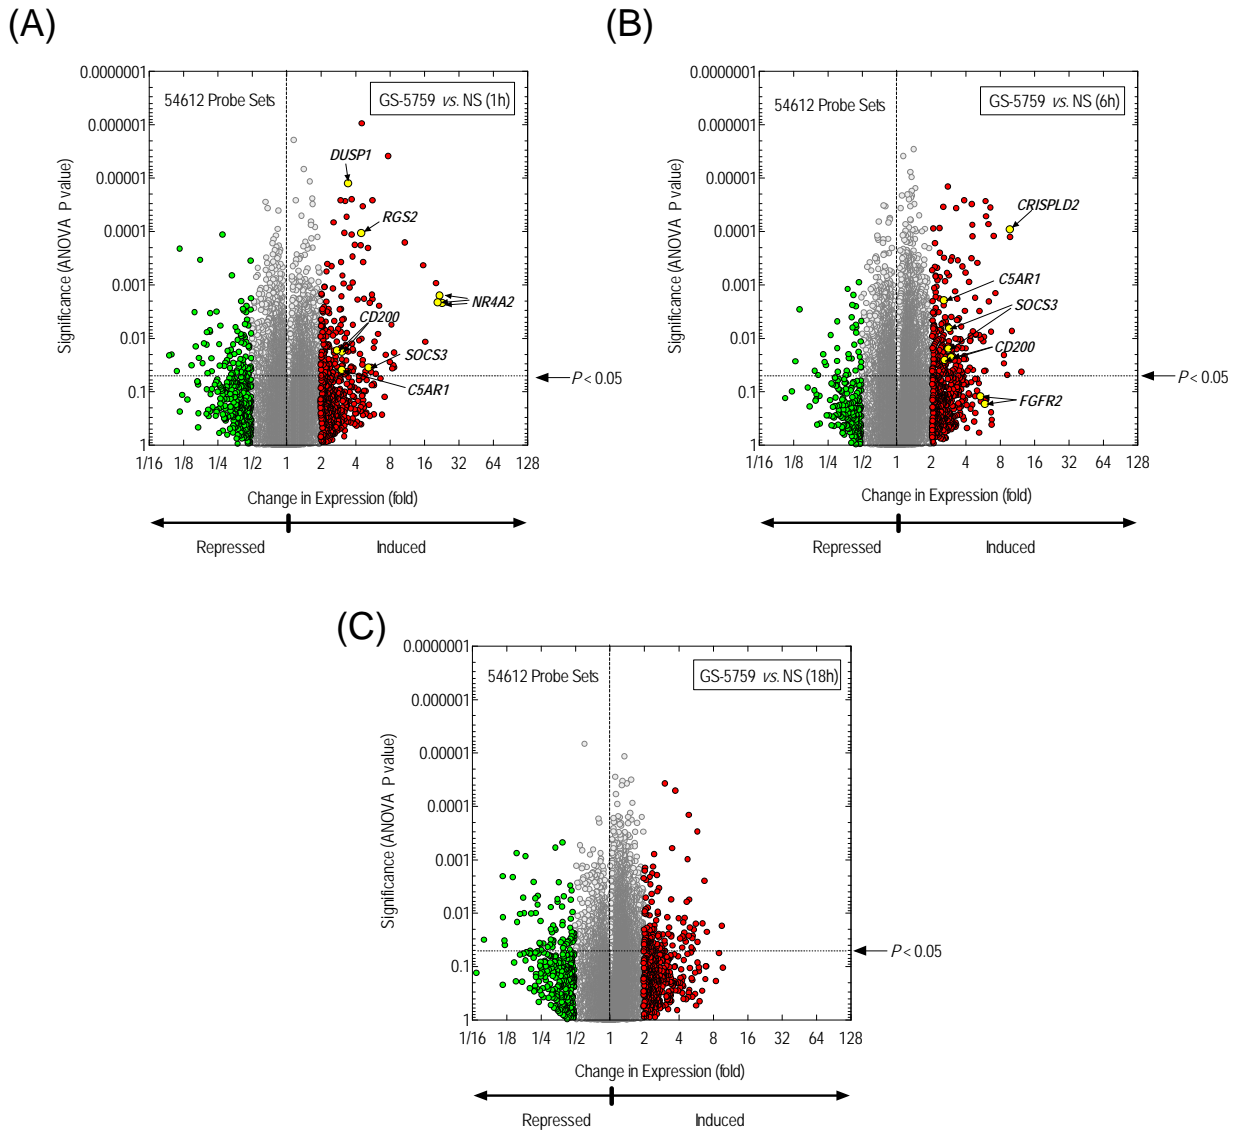

**Supplemental Fig. 2.** Volcano plots showing global gene expression changes induced in BEAS-2B cells by GS-5759. Total RNA was extracted from cells treated with GS-5759 (10nM) or vehicle for 1h, 6h or 18h (panels A-C respectively) and processed for gene expression changes by microarray. Expression levels of all 47,400+ transcripts (by probe set) are shown relative to time-matched, vehicle-treated cells (NS). Each probe set is represented by a circle coloured grey (transcript changes  $\leq 2$ -fold), red or green (corresponding to transcript that are induced and repressed by  $> 2$ -fold respectively). Yellow circles show GS-5759-induced genes ( $> 2$ -fold) that were validated by real-time PCR (Fig 9; Table 5). Values above the horizontal dashed line represent transcript level expression changes that were significantly different from vehicle ( $P < 0.05$  unadjusted, one-way ANOVA). The vertical dashed lines indicate baseline gene expression.

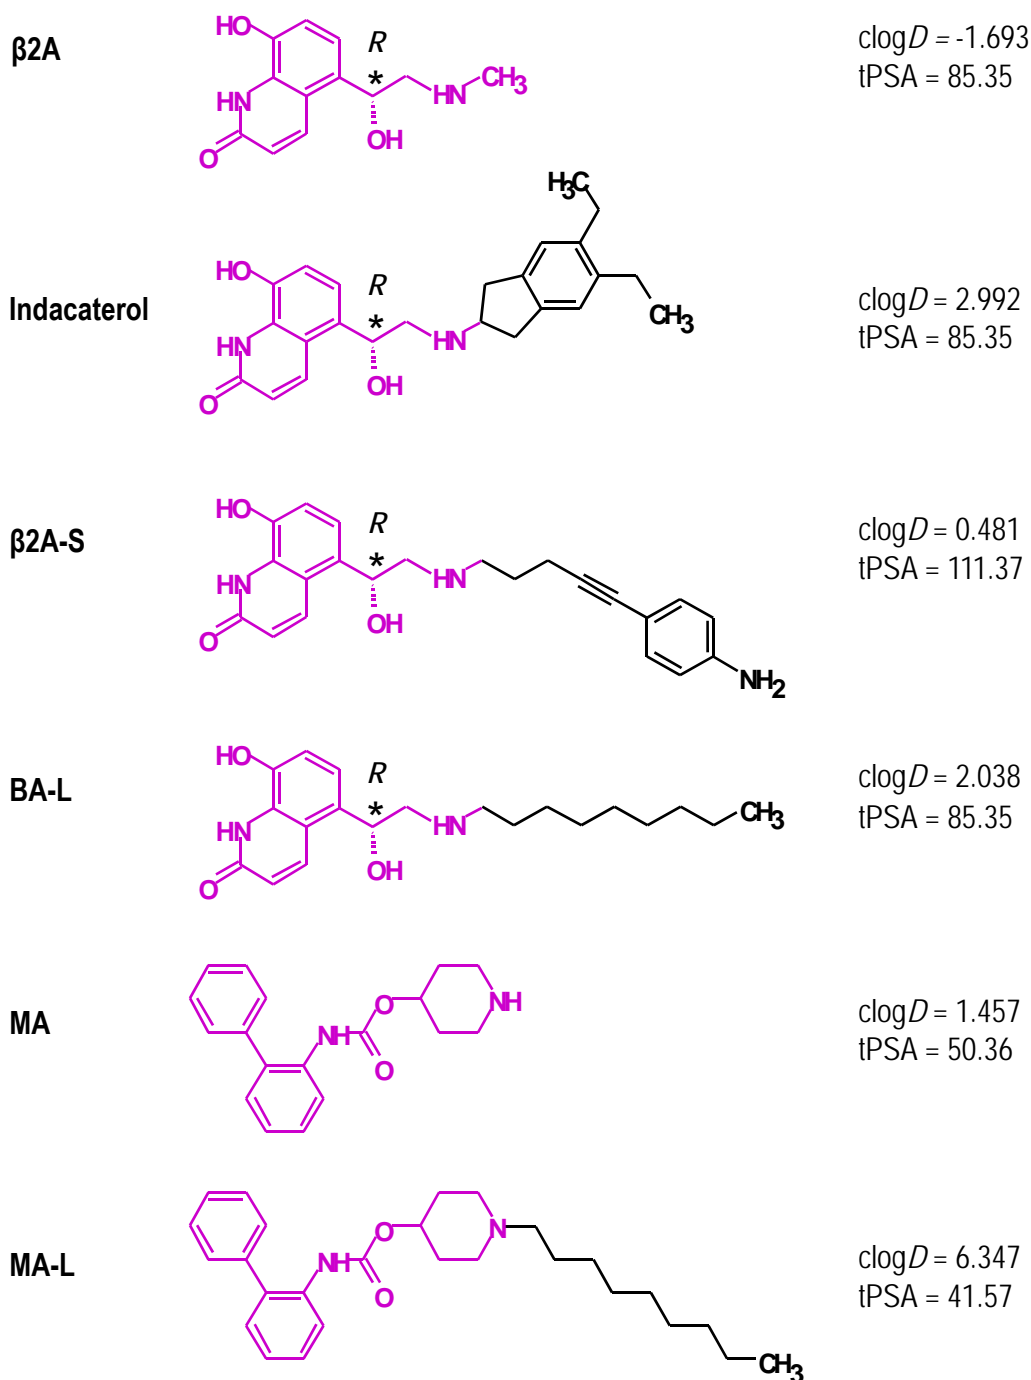

**Supplemental Fig. 3.** Structures of the quinolinone- and biphenyl-containing orthosteres that confer  $\beta_2$ -adrenoceptor agonism ( $\beta$ 2A) and muscarinic receptor antagonism (MA) respectively. Indacaterol is an analogue of  $\beta$ 2A in which the methyl group of the secondary amine is replaced with 5,6-diethyl-2,3-dihydro-1*H*-indene.  $\beta$ 2A-S and BA-L represent the same quinolinone-containing orthostere linked to 4-(pent-1-yn-1-yl)aniline (this study) and nonane (Steinfeld et al., 2011) respectively. MA and MA-L represent the biphenyl-containing orthostere with and without nonane (Steinfeld et al., 2011). The distribution coefficients ( $\text{clog}D$ ) and total polar surface area (tPSA) values were calculated using MedChem Designer, Simulations Plus Inc (Lancaster, CA). The asterisks indicate chiral centres.

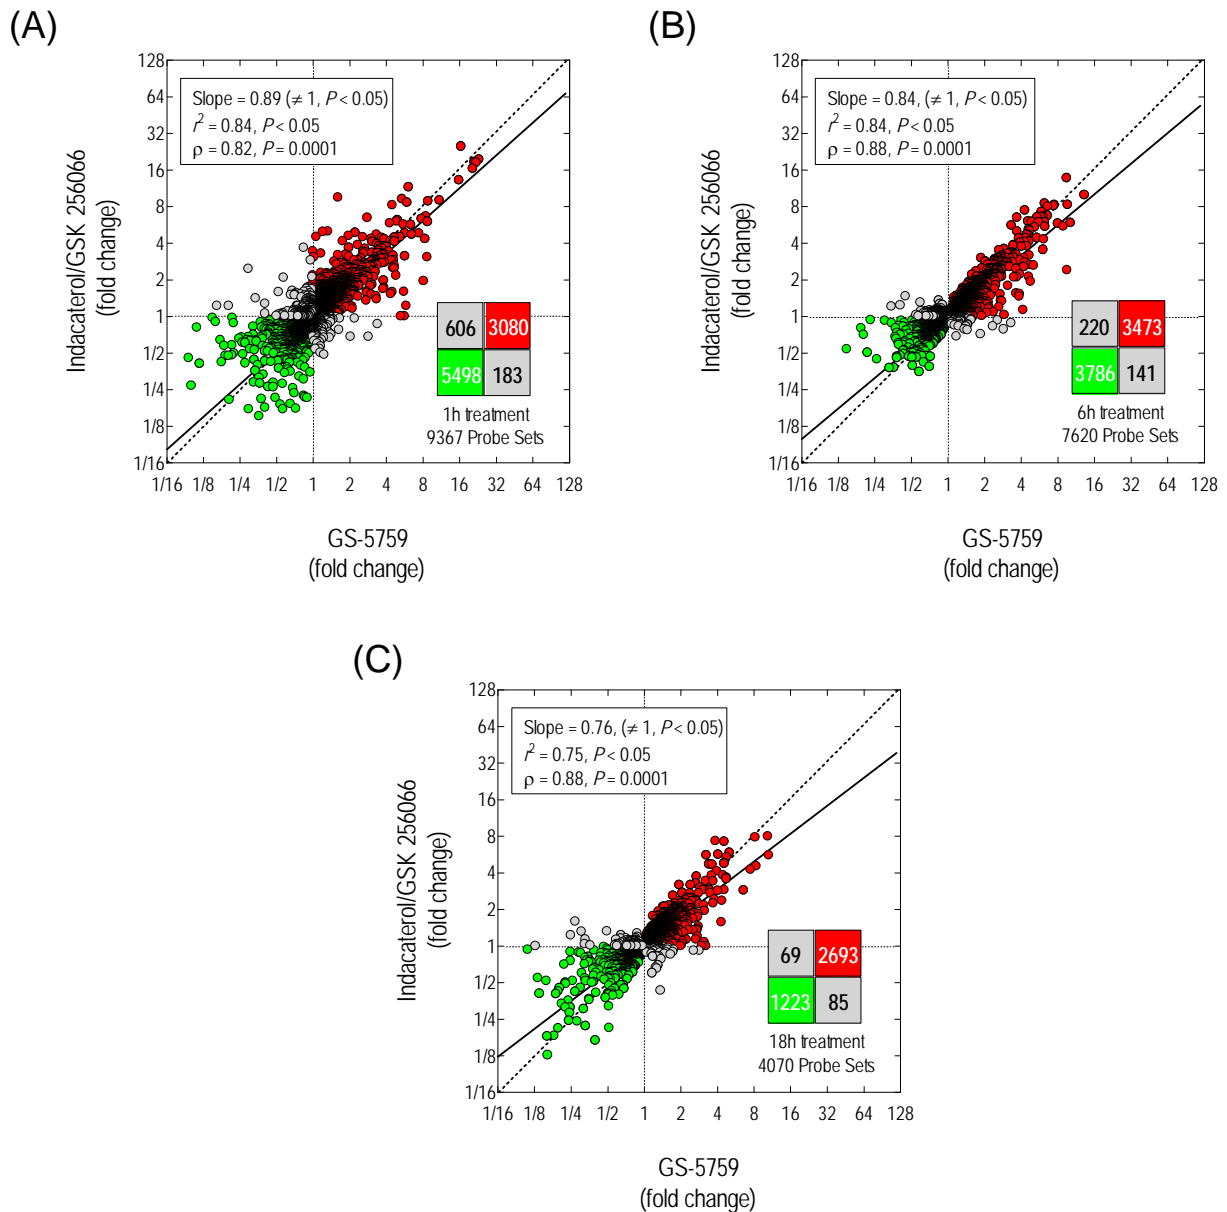

**Supplemental Fig. 4.** Relationship between gene expression changes in BEAS-2B cells induced by GS-5759 and Ind/GSK. Total RNA was extracted from cells treated with GS-5759 (10nM), Ind/GSK (both at 10nM) or vehicle for 1h, 6h or 18h (panels A, B and C respectively) and processed for gene expression changes by microarray. Transcripts (by probe set) with expression level changes that were statistically different ( $P < 0.05$  unadjusted, one-way ANOVA) from time-matched, vehicle-treated cells were subjected to rank order and linear correlations. The values in the red and green coloured quadrants correspond to the number of probes sets indicating gene induction and repression by both treatments respectively. The numbers in the grey quadrants indicate genes (by probe set) that were induced by GS-5759 and repressed by Ind/GSK and *vice versa* although these changes were not validated. The solid and dashed diagonal lines represent linear regression and the line of identity respectively.

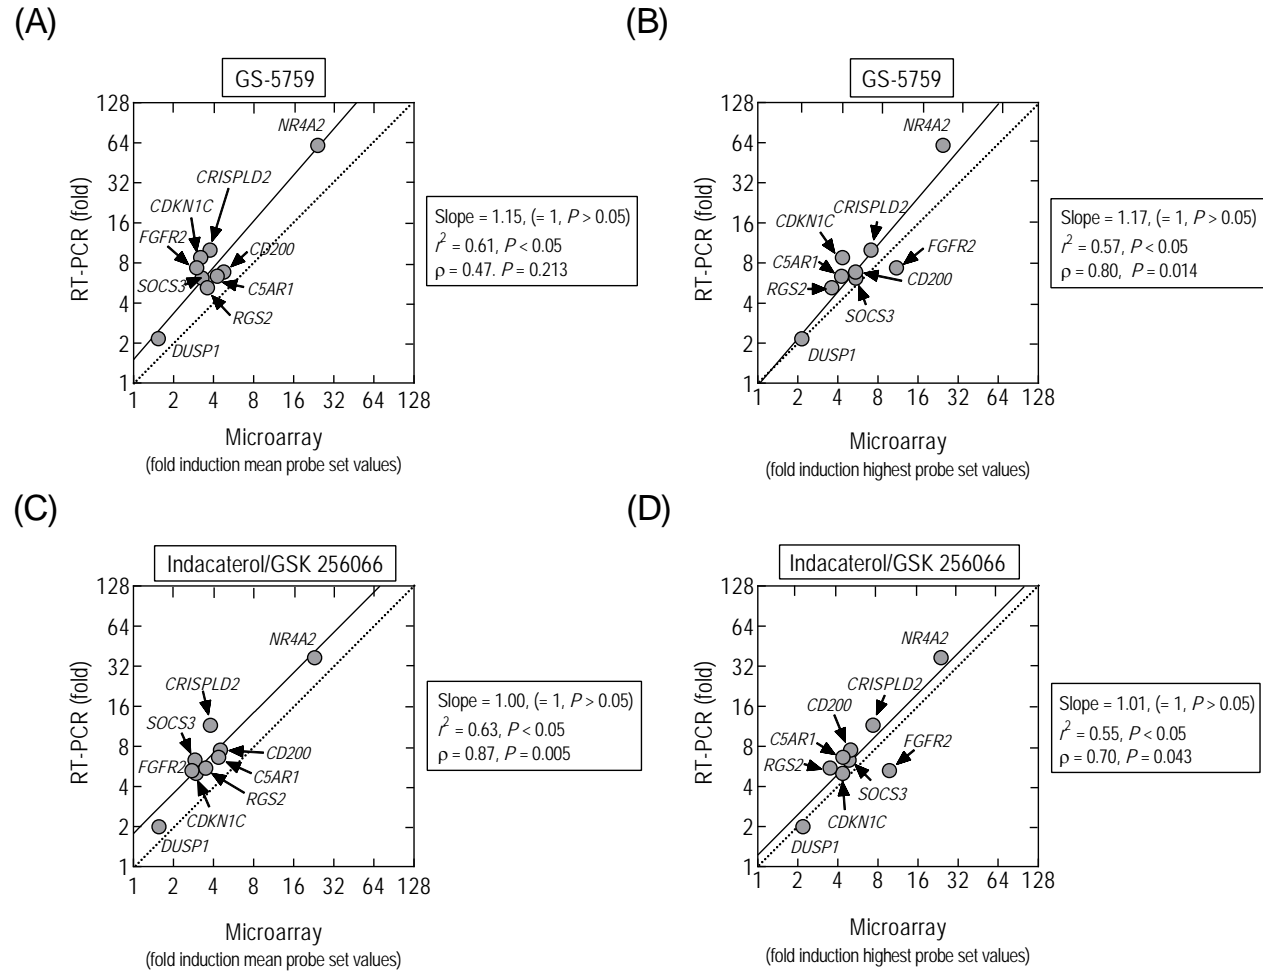

**Supplemental Fig. 5.** Relationship between gene expression changes determined by microarray and RT-PCR. Total RNA was extracted from cells treated for 2h with GS-5759 (10nM), Ind/GSK (both 10nM) or vehicle and processed for gene expression changes by microarray. The induction of nine genes on the array was then validated by RT-PCR (Fig. 9; Table 5). Changes in expression detected by both methods were subjected to rank order and linear correlations under conditions where the fold induction on the microarray was calculated from the mean of all probe set values (panels A & B) and the highest probe set value (panels C & D). The solid and dashed diagonal lines represent linear regression and the line of identity respectively.

(A)

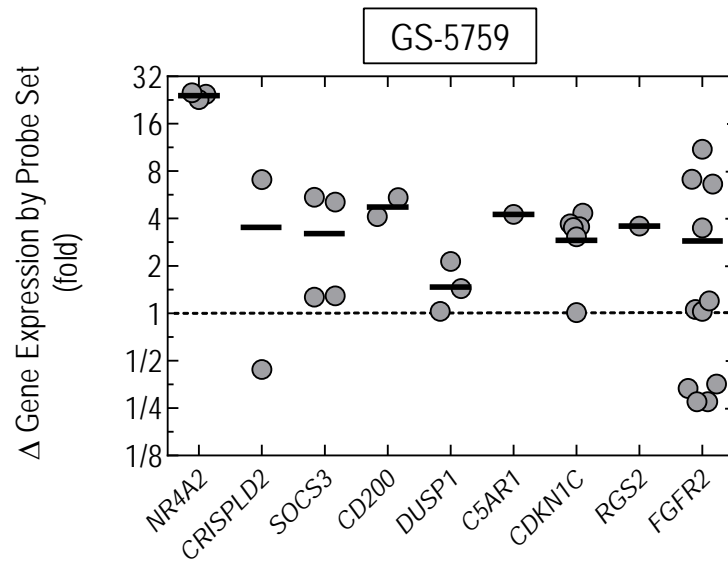

(B)

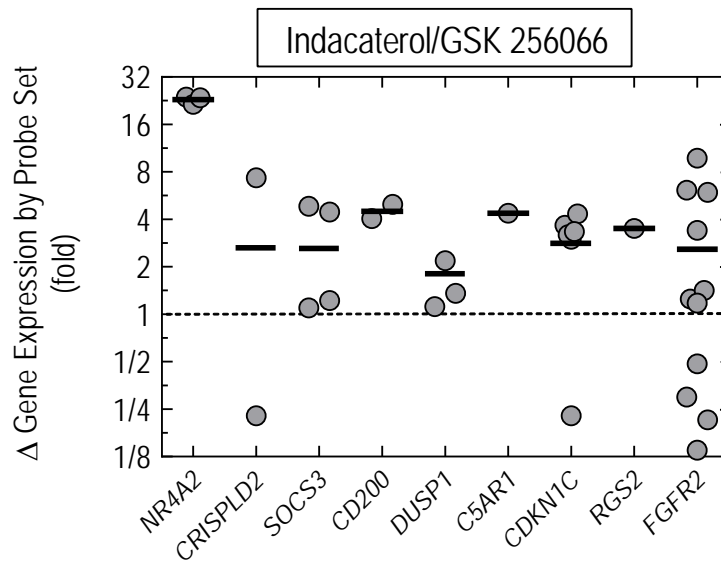

**Supplemental Fig. 6.** Effect of probe set on the assessment of gene expression changes in BEAS-2B cells. Total RNA was extracted from cells treated with GS-5759 (10nM), Ind/GSK (both 10nM) or vehicle for 2h and processed for gene expression changes by microarray. The panels show the effect of treatments relative to vehicle on the expression of nine genes for which there is one or more probe set on each Affymetrix® U133plus2.0 human gene chip. Each probe set is represented by a grey circle and each black horizontal line is the gene expression change calculated using the mean data of all probe sets for that gene. The dashed horizontal line represents baseline gene expression.

**Supplemental Table 1.** Primer pairs for real-time PCR.

| Gene                                      | Oligonucleotide                              | Accession Number(s)                                                                                                                                         |
|-------------------------------------------|----------------------------------------------|-------------------------------------------------------------------------------------------------------------------------------------------------------------|
| <b><i>SOCS3</i></b>                       |                                              | NM_003955.3                                                                                                                                                 |
| Forward                                   | 5' -GAT TCT CCT TCA ATT CCT CAG CTT-3'       |                                                                                                                                                             |
| Reverse                                   | 5' -ATT AGT TCA GCA TTC CCG AAG TGT-3'       |                                                                                                                                                             |
| <b><i>CRISPLD2</i></b>                    |                                              | NM_031476.3                                                                                                                                                 |
| Forward                                   | 5' -CAA ACC TTC CAG CTC ATT CAT G-3'         |                                                                                                                                                             |
| Reverse                                   | 5' -GGT CGT GTA GCA GTC CAA ATC C-3'         |                                                                                                                                                             |
| <b><i>C5AR1</i></b>                       |                                              | NM_001736.3                                                                                                                                                 |
| Forward                                   | 5' -TCC TCC GGA ACG TGT TGA CT-3'            |                                                                                                                                                             |
| Reverse                                   | 5' -AGC GCG TGA ATG ACT TGC T-3'             |                                                                                                                                                             |
| <b><i>FGFR2</i></b>                       |                                              | NM_000141.4, NM_022970.3, NM_001144913.1, NM_023029.2<br>NM_001144914.1, NM_001144915.1, NM_001144916.1,<br>NM_001144917.1, NM_001144918.1, NM_001144919.1. |
| Forward                                   | 5' -CAT CGC ATT GGA GGC TAC AAG-3'           |                                                                                                                                                             |
| Reverse                                   | 5' -GGG ACC ACA CTT TCC ATA ATG AG-3'        |                                                                                                                                                             |
| <b><i>CD200</i></b>                       |                                              | NM_005944.5, NM_001004196.2                                                                                                                                 |
| Forward                                   | 5' -GGA CTG TGA CCG ACT TTA AGC AA-3'        |                                                                                                                                                             |
| Reverse                                   | 5' -AGC AAT AGC GGA ACT GAA AAC C-3'         |                                                                                                                                                             |
| <b><i>DUSP1 (MKP1)</i></b>                |                                              | NM_004417.3                                                                                                                                                 |
| Forward                                   | 5' -CGC GCA AGT CTT CTT CCT CA-3'            |                                                                                                                                                             |
| Reverse                                   | 5' -GAT GCT TCG CCT CTG CTT CA-3'            |                                                                                                                                                             |
| <b><i>NR4A2</i></b>                       |                                              | NM_006186.3                                                                                                                                                 |
| Forward                                   | 5' -GGC CCA TGT CGA CTC CAA-3'               |                                                                                                                                                             |
| Reverse                                   | 5' -GTC AGG GTT CGC CTG GAA-3'               |                                                                                                                                                             |
| <b><i>RGS2</i></b>                        |                                              | NM_002923                                                                                                                                                   |
| Forward                                   | 5' -CCT CAA AAG CAA GGA AAA TAT ATA CTG A-3' |                                                                                                                                                             |
| Reverse                                   | 5' -AGT TGT AAA GCA GCC ACT TGT AGC T-3'     |                                                                                                                                                             |
| <b><i>CDKN1C (p57<sup>kip2</sup>)</i></b> |                                              | NM_000076.2, NM_001122630.1, NM_001122631.1                                                                                                                 |
| Forward                                   | 5' -CTG TCC GGG CCT CTG ATC T-3'             |                                                                                                                                                             |
| Reverse                                   | 5' -CAT CGC CCG ACG ACT TCT-3'               |                                                                                                                                                             |
| <b><i>GAPDH</i></b>                       |                                              | NM_002046.5, NM_001256799.2                                                                                                                                 |
| Forward                                   | 5' -ATG GAA ATC CCA TCA CCA TCT T-3'         |                                                                                                                                                             |
| Reverse                                   | 5' -CAG CAT CGC CCC ACT TG-3'                |                                                                                                                                                             |

Forward and reverse primers for each gene are listed. Official HGNC gene symbols are shown and, where appropriate, common genes symbols are provided in parentheses. Generic primers were used for genes that can encode multiple isoforms.



**Supplemental Table 2.** DAVID-derived functional clusters of related GO terms from all GS-5759-induced genes with expression level changes >2 fold at 1h, 2h, 6h and 18h.

### 1h GS-5759

| <u>Annotation Cluster 1</u> | <u>Enrichment Score: 2.76</u>                                                                | <u>Count</u> | <u>P-Value</u> |
|-----------------------------|----------------------------------------------------------------------------------------------|--------------|----------------|
| GOTERM_BP_FAT               | behavior                                                                                     | 12           | 1.50E-04       |
| GOTERM_BP_FAT               | locomotory behavior                                                                          | 9            | 2.90E-04       |
| SP_PIR_KEYWORDS             | chemotaxis                                                                                   | 5            | 7.20E-04       |
| GOTERM_BP_FAT               | chemotaxis                                                                                   | 6            | 3.20E-03       |
| GOTERM_BP_FAT               | taxis                                                                                        | 6            | 3.20E-03       |
| GOTERM_BP_FAT               | defense response                                                                             | 8            | 8.70E-02       |
| <br>                        |                                                                                              |              |                |
| <u>Annotation Cluster 2</u> | <u>Enrichment Score: 1.89</u>                                                                | <u>Count</u> | <u>P-Value</u> |
| GOTERM_BP_FAT               | positive regulation of cellular biosynthetic process                                         | 13           | 1.00E-03       |
| GOTERM_BP_FAT               | positive regulation of biosynthetic process                                                  | 13           | 1.20E-03       |
| GOTERM_BP_FAT               | positive regulation of nitrogen compound metabolic process                                   | 12           | 2.10E-03       |
| GOTERM_BP_FAT               | positive regulation of transcription from RNA polymerase II promoter                         | 9            | 2.10E-03       |
| GOTERM_BP_FAT               | positive regulation of macromolecule metabolic process                                       | 14           | 2.30E-03       |
| GOTERM_BP_FAT               | positive regulation of macromolecule biosynthetic process                                    | 12           | 2.30E-03       |
| GOTERM_BP_FAT               | positive regulation of gene expression                                                       | 11           | 3.10E-03       |
| GOTERM_BP_FAT               | positive regulation of nucleobase, nucleoside, nucleotide and nucleic acid metabolic process | 11           | 5.20E-03       |
| GOTERM_BP_FAT               | regulation of transcription from RNA polymerase II promoter                                  | 12           | 5.20E-03       |
| GOTERM_BP_FAT               | positive regulation of transcription                                                         | 10           | 8.20E-03       |
| GOTERM_BP_FAT               | positive regulation of transcription, DNA-dependent                                          | 9            | 9.40E-03       |
| GOTERM_BP_FAT               | positive regulation of RNA metabolic process                                                 | 9            | 9.90E-03       |
| GOTERM_MF_FAT               | transcription regulator activity                                                             | 18           | 1.10E-02       |
| SP_PIR_KEYWORDS             | transcription regulation                                                                     | 20           | 1.70E-02       |
| GOTERM_MF_FAT               | transcription factor activity                                                                | 13           | 1.70E-02       |
| SP_PIR_KEYWORDS             | transcription                                                                                | 20           | 2.10E-02       |
| GOTERM_MF_FAT               | transcription activator activity                                                             | 7            | 4.30E-02       |
| GOTERM_BP_FAT               | regulation of transcription                                                                  | 24           | 4.30E-02       |
| GOTERM_BP_FAT               | regulation of transcription, DNA-dependent                                                   | 18           | 4.30E-02       |
| GOTERM_BP_FAT               | regulation of RNA metabolic process                                                          | 18           | 5.20E-02       |
| GOTERM_BP_FAT               | transcription                                                                                | 20           | 5.50E-02       |
| SP_PIR_KEYWORDS             | dna-binding                                                                                  | 17           | 5.70E-02       |
| GOTERM_MF_FAT               | sequence-specific DNA binding                                                                | 8            | 8.40E-02       |
| SP_PIR_KEYWORDS             | nucleus                                                                                      | 30           | 1.50E-01       |
| GOTERM_MF_FAT               | DNA binding                                                                                  | 18           | 2.80E-01       |
| <br>                        |                                                                                              |              |                |
| <u>Annotation Cluster 3</u> | <u>Enrichment Score: 1.24</u>                                                                | <u>Count</u> | <u>P-Value</u> |
| SP_PIR_KEYWORDS             | cytokine                                                                                     | 6            | 3.60E-03       |
| GOTERM_MF_FAT               | cytokine activity                                                                            | 6            | 7.40E-03       |
| GOTERM_BP_FAT               | immune response                                                                              | 11           | 1.00E-02       |
| GOTERM_BP_FAT               | inflammatory response                                                                        | 7            | 1.60E-02       |
| GOTERM_BP_FAT               | cell-cell signaling                                                                          | 9            | 3.20E-02       |
| GOTERM_BP_FAT               | response to wounding                                                                         | 8            | 4.60E-02       |
| KEGG_PATHWAY                | cytokine-cytokine receptor interaction                                                       | 5            | 8.00E-02       |
| GOTERM_BP_FAT               | defense response                                                                             | 8            | 8.70E-02       |
| GOTERM_CC_FAT               | extracellular space                                                                          | 7            | 1.50E-01       |
| GOTERM_CC_FAT               | extracellular region part                                                                    | 7            | 3.90E-01       |
| GOTERM_CC_FAT               | extracellular region                                                                         | 11           | 6.20E-01       |
| SP_PIR_KEYWORDS             | secreted                                                                                     | 9            | 7.40E-01       |

### 2h GS-5759

| <u>Annotation Cluster 1</u> | <u>Enrichment Score: 3.73</u>                                                                | <u>Count</u> | <u>P-Value</u> |
|-----------------------------|----------------------------------------------------------------------------------------------|--------------|----------------|
| GOTERM_BP_FAT               | regulation of transcription from RNA polymerase II promoter                                  | 26           | 4.10E-08       |
| GOTERM_MF_FAT               | transcription regulator activity                                                             | 36           | 4.70E-07       |
| GOTERM_MF_FAT               | transcription factor activity                                                                | 26           | 5.20E-06       |
| GOTERM_BP_FAT               | regulation of transcription, DNA-dependent                                                   | 38           | 5.70E-06       |
| GOTERM_BP_FAT               | regulation of RNA metabolic process                                                          | 38           | 9.60E-06       |
| GOTERM_MF_FAT               | sequence-specific DNA binding                                                                | 19           | 2.00E-05       |
| GOTERM_BP_FAT               | positive regulation of transcription, DNA-dependent                                          | 16           | 7.50E-05       |
| GOTERM_BP_FAT               | positive regulation of RNA metabolic process                                                 | 16           | 8.30E-05       |
| GOTERM_BP_FAT               | positive regulation of gene expression                                                       | 17           | 2.00E-04       |
| GOTERM_BP_FAT               | positive regulation of nitrogen compound metabolic process                                   | 18           | 2.10E-04       |
| SP_PIR_KEYWORDS             | transcription regulation                                                                     | 34           | 2.40E-04       |
| GOTERM_BP_FAT               | regulation of transcription                                                                  | 44           | 2.60E-04       |
| GOTERM_BP_FAT               | positive regulation of transcription from RNA polymerase II promoter                         | 13           | 3.20E-04       |
| GOTERM_BP_FAT               | positive regulation of cellular biosynthetic process                                         | 18           | 4.30E-04       |
| GOTERM_BP_FAT               | positive regulation of nucleobase, nucleoside, nucleotide and nucleic acid metabolic process | 17           | 4.50E-04       |
| GOTERM_BP_FAT               | positive regulation of transcription                                                         | 16           | 4.60E-04       |
| GOTERM_BP_FAT               | positive regulation of biosynthetic process                                                  | 18           | 5.00E-04       |
| GOTERM_BP_FAT               | positive regulation of macromolecule biosynthetic process                                    | 17           | 7.40E-04       |
| SP_PIR_KEYWORDS             | transcription                                                                                | 33           | 7.70E-04       |

|                 |                                                        |    |          |
|-----------------|--------------------------------------------------------|----|----------|
| GOTERM_BP_FAT   | positive regulation of macromolecule metabolic process | 19 | 2.00E-03 |
| GOTERM_MF_FAT   | transcription activator activity                       | 12 | 2.00E-03 |
| SP_PIR_KEYWORDS | nucleus                                                | 54 | 2.50E-03 |
| GOTERM_BP_FAT   | transcription                                          | 33 | 7.30E-03 |
| SP_PIR_KEYWORDS | dna-binding                                            | 27 | 9.90E-03 |
| GOTERM_MF_FAT   | DNA binding                                            | 31 | 5.30E-02 |

**Annotation Cluster 2**

**Enrichment Score: 3.47**

**Count**

**P-Value**

|               |                                                       |    |          |
|---------------|-------------------------------------------------------|----|----------|
| GOTERM_BP_FAT | tube development                                      | 14 | 2.70E-07 |
| GOTERM_BP_FAT | tube morphogenesis                                    | 9  | 3.70E-05 |
| GOTERM_BP_FAT | embryonic morphogenesis                               | 13 | 5.40E-05 |
| GOTERM_BP_FAT | chordate embryonic development                        | 13 | 1.10E-04 |
| GOTERM_BP_FAT | embryonic development ending in birth or egg hatching | 13 | 1.20E-04 |
| GOTERM_BP_FAT | embryonic organ development                           | 9  | 3.10E-04 |
| GOTERM_BP_FAT | sensory organ development                             | 10 | 4.60E-04 |
| GOTERM_BP_FAT | embryonic organ morphogenesis                         | 7  | 2.10E-03 |
| GOTERM_BP_FAT | skeletal system development                           | 10 | 4.50E-03 |
| GOTERM_BP_FAT | pattern specification process                         | 8  | 1.70E-02 |
| GOTERM_BP_FAT | regionalization                                       | 6  | 4.60E-02 |

**Annotation Cluster 3**

**Enrichment Score: 3.17**

**Count**

**P-Value**

|                 |                                                                                              |    |          |
|-----------------|----------------------------------------------------------------------------------------------|----|----------|
| GOTERM_BP_FAT   | regulation of transcription from RNA polymerase II promoter                                  | 26 | 4.10E-08 |
| GOTERM_BP_FAT   | negative regulation of gene expression                                                       | 15 | 4.70E-04 |
| GOTERM_BP_FAT   | negative regulation of transcription, DNA-dependent                                          | 12 | 8.20E-04 |
| GOTERM_BP_FAT   | negative regulation of RNA metabolic process                                                 | 12 | 9.40E-04 |
| GOTERM_MF_FAT   | transcription repressor activity                                                             | 11 | 9.50E-04 |
| GOTERM_BP_FAT   | negative regulation of macromolecule biosynthetic process                                    | 15 | 1.00E-03 |
| GOTERM_BP_FAT   | negative regulation of cellular biosynthetic process                                         | 15 | 1.30E-03 |
| SP_PIR_KEYWORDS | repressor                                                                                    | 12 | 1.40E-03 |
| GOTERM_BP_FAT   | negative regulation of biosynthetic process                                                  | 15 | 1.60E-03 |
| GOTERM_BP_FAT   | negative regulation of nucleobase, nucleoside, nucleotide and nucleic acid metabolic process | 14 | 1.70E-03 |
| GOTERM_BP_FAT   | negative regulation of nitrogen compound metabolic process                                   | 14 | 1.90E-03 |
| GOTERM_BP_FAT   | negative regulation of transcription                                                         | 13 | 2.00E-03 |
| GOTERM_BP_FAT   | negative regulation of macromolecule metabolic process                                       | 17 | 2.40E-03 |
| GOTERM_BP_FAT   | negative regulation of transcription from RNA polymerase II promoter                         | 9  | 5.00E-03 |

**Annotation Cluster 4**

**Enrichment Score: 3.17**

**Count**

**P-Value**

|               |                                              |    |          |
|---------------|----------------------------------------------|----|----------|
| GOTERM_BP_FAT | regulation of apoptosis                      | 24 | 3.70E-06 |
| GOTERM_BP_FAT | regulation of programmed cell death          | 24 | 4.40E-06 |
| GOTERM_BP_FAT | regulation of cell death                     | 24 | 4.70E-06 |
| GOTERM_BP_FAT | negative regulation of apoptosis             | 14 | 4.90E-05 |
| GOTERM_BP_FAT | negative regulation of programmed cell death | 14 | 5.70E-05 |
| GOTERM_BP_FAT | negative regulation of cell death            | 14 | 5.90E-05 |
| GOTERM_BP_FAT | anti-apoptosis                               | 10 | 2.10E-04 |
| GOTERM_BP_FAT | positive regulation of apoptosis             | 10 | 2.70E-02 |
| GOTERM_BP_FAT | positive regulation of programmed cell death | 10 | 2.80E-02 |
| GOTERM_BP_FAT | positive regulation of cell death            | 10 | 2.90E-02 |
| GOTERM_BP_FAT | induction of apoptosis                       | 5  | 3.90E-01 |
| GOTERM_BP_FAT | induction of programmed cell death           | 5  | 3.90E-01 |

**Annotation Cluster 5**

**Enrichment Score: 2.71**

**Count**

**P-Value**

|               |                                                    |    |          |
|---------------|----------------------------------------------------|----|----------|
| GOTERM_BP_FAT | development of primary male sexual characteristics | 6  | 4.50E-04 |
| GOTERM_BP_FAT | sex differentiation                                | 8  | 7.60E-04 |
| GOTERM_BP_FAT | male sex differentiation                           | 6  | 7.70E-04 |
| GOTERM_BP_FAT | reproductive developmental process                 | 10 | 1.20E-03 |
| GOTERM_BP_FAT | development of primary sexual characteristics      | 7  | 1.60E-03 |
| GOTERM_BP_FAT | reproductive structure development                 | 6  | 8.30E-03 |
| GOTERM_BP_FAT | gonad development                                  | 5  | 2.50E-02 |

**Annotation Cluster 6**

**Enrichment Score: 2.42**

**Count**

**P-Value**

|               |                           |    |          |
|---------------|---------------------------|----|----------|
| GOTERM_MF_FAT | heparin binding           | 7  | 4.70E-04 |
| GOTERM_MF_FAT | glycosaminoglycan binding | 7  | 2.30E-03 |
| GOTERM_MF_FAT | polysaccharide binding    | 7  | 3.70E-03 |
| GOTERM_MF_FAT | pattern binding           | 7  | 3.70E-03 |
| GOTERM_MF_FAT | carbohydrate binding      | 10 | 7.20E-03 |
| GOTERM_CC_FAT | extracellular matrix      | 8  | 2.70E-02 |

**Annotation Cluster 7**

**Enrichment Score: 2.08**

**Count**

**P-Value**

|               |                                       |    |          |
|---------------|---------------------------------------|----|----------|
| GOTERM_BP_FAT | response to endogenous stimulus       | 12 | 2.30E-03 |
| GOTERM_BP_FAT | response to hormone stimulus          | 11 | 3.50E-03 |
| GOTERM_BP_FAT | response to organic substance         | 16 | 5.10E-03 |
| GOTERM_BP_FAT | cellular response to hormone stimulus | 6  | 1.00E-02 |
| GOTERM_BP_FAT | response to peptide hormone stimulus  | 6  | 1.90E-02 |
| GOTERM_BP_FAT | response to steroid hormone stimulus  | 6  | 4.20E-02 |

**Annotation Cluster 8**

**Enrichment Score: 1.99**

**Count**

**P-Value**

|                 |                                         |    |          |
|-----------------|-----------------------------------------|----|----------|
| SP_PIR_KEYWORDS | signal                                  | 43 | 3.80E-03 |
| UP_SEQ_FEATURE  | signal peptide                          | 43 | 4.20E-03 |
| UP_SEQ_FEATURE  | glycosylation site:N-linked (GlcNac...) | 51 | 6.20E-03 |

|                 |                      |    |          |
|-----------------|----------------------|----|----------|
| SP_PIR_KEYWORDS | glycoprotein         | 52 | 8.20E-03 |
| UP_SEQ_FEATURE  | disulfide bond       | 37 | 1.00E-02 |
| SP_PIR_KEYWORDS | disulfide bond       | 37 | 1.60E-02 |
| GOTERM_CC_FAT   | extracellular region | 26 | 2.70E-02 |
| SP_PIR_KEYWORDS | secreted             | 23 | 3.40E-02 |

| <b>Annotation Cluster 9</b> |                                                | <b>Enrichment Score: 1.94</b> | <b>Count</b> | <b>P-Value</b> |
|-----------------------------|------------------------------------------------|-------------------------------|--------------|----------------|
| GOTERM_BP_FAT               | regulation of protein kinase activity          | 11                            | 2.30E-03     |                |
| GOTERM_BP_FAT               | regulation of phosphorylation                  | 13                            | 2.30E-03     |                |
| GOTERM_BP_FAT               | regulation of kinase activity                  | 11                            | 2.90E-03     |                |
| GOTERM_BP_FAT               | regulation of phosphate metabolic process      | 13                            | 3.20E-03     |                |
| GOTERM_BP_FAT               | regulation of phosphorus metabolic process     | 13                            | 3.20E-03     |                |
| GOTERM_BP_FAT               | regulation of transferase activity             | 11                            | 3.90E-03     |                |
| GOTERM_BP_FAT               | regulation of MAP kinase activity              | 6                             | 1.30E-02     |                |
| GOTERM_BP_FAT               | positive regulation of MAP kinase activity     | 5                             | 1.90E-02     |                |
| GOTERM_BP_FAT               | positive regulation of protein kinase activity | 7                             | 2.40E-02     |                |
| GOTERM_BP_FAT               | positive regulation of kinase activity         | 7                             | 2.70E-02     |                |
| GOTERM_BP_FAT               | positive regulation of transferase activity    | 7                             | 3.20E-02     |                |
| GOTERM_BP_FAT               | positive regulation of molecular function      | 10                            | 1.30E-01     |                |
| GOTERM_BP_FAT               | positive regulation of catalytic activity      | 9                             | 1.40E-01     |                |

| <b>Annotation Cluster 10</b> |                       | <b>Enrichment Score: 1.68</b> | <b>Count</b> | <b>P-Value</b> |
|------------------------------|-----------------------|-------------------------------|--------------|----------------|
| GOTERM_BP_FAT                | death                 | 15                            | 1.30E-02     |                |
| SP_PIR_KEYWORDS              | apoptosis             | 9                             | 1.80E-02     |                |
| GOTERM_BP_FAT                | programmed cell death | 13                            | 1.80E-02     |                |
| GOTERM_BP_FAT                | cell death            | 14                            | 2.60E-02     |                |
| GOTERM_BP_FAT                | apoptosis             | 12                            | 3.70E-02     |                |

| <b>Annotation Cluster 11</b> |                                                  | <b>Enrichment Score: 1.66</b> | <b>Count</b> | <b>P-Value</b> |
|------------------------------|--------------------------------------------------|-------------------------------|--------------|----------------|
| GOTERM_BP_FAT                | reproductive developmental process               | 10                            | 1.20E-03     |                |
| GOTERM_BP_FAT                | multicellular organism reproduction              | 12                            | 9.00E-03     |                |
| GOTERM_BP_FAT                | reproductive process in a multicellular organism | 12                            | 9.00E-03     |                |
| GOTERM_BP_FAT                | sexual reproduction                              | 11                            | 1.60E-02     |                |
| GOTERM_BP_FAT                | gamete generation                                | 9                             | 4.30E-02     |                |
| GOTERM_BP_FAT                | male gamete generation                           | 6                             | 1.90E-01     |                |
| GOTERM_BP_FAT                | spermatogenesis                                  | 6                             | 1.90E-01     |                |

| <b>Annotation Cluster 12</b> |                                        | <b>Enrichment Score: 1.39</b> | <b>Count</b> | <b>P-Value</b> |
|------------------------------|----------------------------------------|-------------------------------|--------------|----------------|
| GOTERM_CC_FAT                | extracellular region part              | 17                            | 6.60E-03     |                |
| GOTERM_BP_FAT                | response to wounding                   | 12                            | 1.60E-02     |                |
| SP_PIR_KEYWORDS              | cytokine                               | 6                             | 2.10E-02     |                |
| GOTERM_MF_FAT                | cytokine activity                      | 6                             | 4.00E-02     |                |
| GOTERM_BP_FAT                | immune response                        | 13                            | 4.10E-02     |                |
| GOTERM_BP_FAT                | inflammatory response                  | 8                             | 4.30E-02     |                |
| KEGG_PATHWAY                 | cytokine-cytokine receptor interaction | 6                             | 9.90E-02     |                |
| GOTERM_CC_FAT                | extracellular space                    | 10                            | 1.20E-01     |                |
| GOTERM_BP_FAT                | defense response                       | 10                            | 1.60E-01     |                |

| <b>Annotation Cluster 13</b> |                                              | <b>Enrichment Score: 1.38</b> | <b>Count</b> | <b>P-Value</b> |
|------------------------------|----------------------------------------------|-------------------------------|--------------|----------------|
| GOTERM_BP_FAT                | positive regulation of lymphocyte activation | 5                             | 1.60E-02     |                |
| GOTERM_BP_FAT                | positive regulation of leukocyte activation  | 5                             | 2.10E-02     |                |
| GOTERM_BP_FAT                | positive regulation of cell activation       | 5                             | 2.40E-02     |                |
| GOTERM_BP_FAT                | regulation of T cell activation              | 5                             | 2.90E-02     |                |
| GOTERM_BP_FAT                | regulation of lymphocyte activation          | 5                             | 5.90E-02     |                |
| GOTERM_BP_FAT                | regulation of leukocyte activation           | 5                             | 8.30E-02     |                |
| GOTERM_BP_FAT                | positive regulation of immune system process | 6                             | 8.80E-02     |                |
| GOTERM_BP_FAT                | regulation of cell activation                | 5                             | 9.60E-02     |                |

## 6h GS-5759

| <b>Annotation Cluster 1</b> |                                         | <b>Enrichment Score: 3.23</b> | <b>Count</b> | <b>P-Value</b> |
|-----------------------------|-----------------------------------------|-------------------------------|--------------|----------------|
| UP_SEQ_FEATURE              | glycosylation site:N-linked (GlcNAc...) | 49                            | 4.60E-05     |                |
| SP_PIR_KEYWORDS             | glycoprotein                            | 49                            | 1.30E-04     |                |
| UP_SEQ_FEATURE              | disulfide bond                          | 36                            | 2.20E-04     |                |
| SP_PIR_KEYWORDS             | disulfide bond                          | 36                            | 3.90E-04     |                |
| SP_PIR_KEYWORDS             | signal                                  | 34                            | 8.90E-03     |                |
| UP_SEQ_FEATURE              | signal peptide                          | 34                            | 9.80E-03     |                |

| <b>Annotation Cluster 2</b> |                                         | <b>Enrichment Score: 2.27</b> | <b>Count</b> | <b>P-Value</b> |
|-----------------------------|-----------------------------------------|-------------------------------|--------------|----------------|
| UP_SEQ_FEATURE              | glycosylation site:N-linked (GlcNAc...) | 49                            | 4.60E-05     |                |
| SP_PIR_KEYWORDS             | glycoprotein                            | 49                            | 1.30E-04     |                |
| GOTERM_CC_FAT               | intrinsic to plasma membrane            | 19                            | 1.40E-03     |                |
| GOTERM_CC_FAT               | integral to plasma membrane             | 17                            | 6.70E-03     |                |
| SP_PIR_KEYWORDS             | membrane                                | 57                            | 7.40E-03     |                |
| GOTERM_CC_FAT               | plasma membrane                         | 38                            | 8.20E-03     |                |
| UP_SEQ_FEATURE              | topological domain:Extracellular        | 30                            | 8.30E-03     |                |
| UP_SEQ_FEATURE              | topological domain:Cytoplasmic          | 35                            | 9.70E-03     |                |
| UP_SEQ_FEATURE              | transmembrane region                    | 46                            | 1.50E-02     |                |

|                 |                       |    |          |
|-----------------|-----------------------|----|----------|
| SP_PIR_KEYWORDS | transmembrane         | 46 | 1.60E-02 |
| GOTERM_CC_FAT   | intrinsic to membrane | 49 | 1.80E-02 |
| GOTERM_CC_FAT   | plasma membrane part  | 23 | 4.10E-02 |
| GOTERM_CC_FAT   | integral to membrane  | 45 | 6.40E-02 |

| <b>Annotation Cluster 3</b> |                                            | <b>Enrichment Score: 1.6</b> | <b>Count</b> | <b>P-Value</b> |
|-----------------------------|--------------------------------------------|------------------------------|--------------|----------------|
| GOTERM_BP_FAT               | regulation of phosphorylation              | 10                           | 5.00E-03     |                |
| GOTERM_BP_FAT               | regulation of phosphorus metabolic process | 10                           | 6.50E-03     |                |
| GOTERM_BP_FAT               | regulation of phosphate metabolic process  | 10                           | 6.50E-03     |                |
| GOTERM_BP_FAT               | regulation of protein kinase activity      | 6                            | 9.20E-02     |                |
| GOTERM_BP_FAT               | regulation of kinase activity              | 6                            | 1.00E-01     |                |
| GOTERM_BP_FAT               | regulation of transferase activity         | 6                            | 1.20E-01     |                |

| <b>Annotation Cluster 4</b> |                                 | <b>Enrichment Score: 2.13</b> | <b>Count</b> | <b>P-Value</b> |
|-----------------------------|---------------------------------|-------------------------------|--------------|----------------|
| UP_SEQ_FEATURE              | domain:Fibronectin type-III 2   | 5                             | 1.20E-02     |                |
| UP_SEQ_FEATURE              | domain:Fibronectin type-III 1   | 5                             | 1.20E-02     |                |
| INTERPRO                    | fibronectin, type III-like fold | 5                             | 4.10E-02     |                |
| INTERPRO                    | fibronectin, type III           | 5                             | 4.50E-02     |                |
| SMART                       | FN3                             | 5                             | 7.50E-02     |                |

### 18h GS-5759

| <b>Annotation Cluster 1</b> |                                              | <b>Enrichment Score: 1.29</b> | <b>Count</b> | <b>P-Value</b> |
|-----------------------------|----------------------------------------------|-------------------------------|--------------|----------------|
| GOTERM_CC_FAT               | cytoskeletal part                            | 10                            | 9.30E-03     |                |
| GOTERM_CC_FAT               | cytoskeleton                                 | 12                            | 1.40E-02     |                |
| SP_PIR_KEYWORDS             | cytoskeleton                                 | 6                             | 8.60E-02     |                |
| GOTERM_CC_FAT               | non-membrane-bounded organelle               | 14                            | 1.80E-01     |                |
| GOTERM_CC_FAT               | intracellular non-membrane-bounded organelle | 14                            | 1.80E-01     |                |

DAVID IDs of genes induced by GS-5759 determined by microarray with significant expression level changes of > 2-fold (based on *P*-value) were used for functional clustering with the following parameters: similarity term overlap = 5; similarity threshold = 0.5; initial group membership = 5; final group membership = 5; multiple linkage threshold = 0.5. Clusters with enrichment scores > 1.2 are shown, which were considered to be significant.

**Supplemental Table 3.** GS-5759-induced transcripts with expression level changes >2-fold ( $P < 0.05$ ) at 1h, 2h, 6h and 18h used for GO analysis to generate functional clusters

| <b>1h GS-5759</b>   |                             | <i>139 probe sets are listed correspondinmg to 117 DEGs</i>                                                      |                    |                 |
|---------------------|-----------------------------|------------------------------------------------------------------------------------------------------------------|--------------------|-----------------|
| <b>Probe Set ID</b> | <b>Gene Symbol</b>          | <b>UniGene Name</b>                                                                                              | <b>Fold Change</b> | <b>P-Value</b>  |
| 204621_s_at         | <a href="#">NR4A2</a>       | nuclear receptor subfamily 4, group A, member 2                                                                  | <b>23.35</b>       | <b>2.25E-03</b> |
| 204622_x_at         | <a href="#">NR4A2</a>       | nuclear receptor subfamily 4, group A, member 2                                                                  | <b>22.07</b>       | <b>1.64E-03</b> |
| 216248_s_at         | <a href="#">NR4A2</a>       | nuclear receptor subfamily 4, group A, member 2                                                                  | <b>21.30</b>       | <b>2.20E-03</b> |
| 209959_at           | <a href="#">NR4A3</a>       | nuclear receptor subfamily 4, group A, member 3                                                                  | 20.63              | 9.65E-04        |
| 231667_at           | <a href="#">SLC39A5</a>     | solute carrier family 39 (metal ion transporter), member 5                                                       | 16.61              | 1.21E-02        |
| 207978_s_at         | <a href="#">NR4A3</a>       | nuclear receptor subfamily 4, group A, member 3                                                                  | 15.89              | 4.47E-04        |
| 205207_at           | <a href="#">IL6</a>         | interleukin 6 (interferon, beta 2)                                                                               | 10.99              | 1.66E-04        |
| 208193_at           | <a href="#">IL9</a>         | interleukin 9                                                                                                    | 8.81               | 1.91E-02        |
| 1553629_a_at        | <a href="#">FAM71B</a>      | family with sequence similarity 71, member B                                                                     | 8.71               | 3.33E-02        |
| 233280_at           | <a href="#">NEBL</a>        | nebullette                                                                                                       | 8.51               | 3.82E-02        |
| 218541_s_at         | <a href="#">C8orf4</a>      | chromosome 8 open reading frame 4                                                                                | 8.39               | 5.75E-03        |
| 228964_at           | <a href="#">PRDM1</a>       | PR domain containing 1, with ZNF domain                                                                          | 7.83               | 4.00E-06        |
| 237648_x_at         | <a href="#">SLC9B2</a>      | Na <sup>+</sup> /H <sup>+</sup> exchanger domain containing 2                                                    | 7.45               | 2.11E-02        |
| 209774_x_at         | <a href="#">CXCL2</a>       | chemokine (C-X-C motif) ligand 2                                                                                 | 6.52               | 2.56E-03        |
| 205476_at           | <a href="#">CCL20</a>       | chemokine (C-C motif) ligand 20                                                                                  | 6.41               | 8.53E-03        |
| 1557660_s_at        | <a href="#">FAM170B-AS1</a> | FAM170B antisense RNA 1                                                                                          | 6.12               | 4.79E-02        |
| 232570_s_at         | <a href="#">ADAM33</a>      | ADAM metallopeptidase domain 33                                                                                  | 5.86               | 1.57E-02        |
| 236610_at           | <a href="#">PDE4D</a>       | phosphodiesterase 4D, cAMP-specific (phosphodiesterase E3 dunce homolog, Drosophila)                             | 5.73               | 1.93E-03        |
| 239818_x_at         | <a href="#">TRIB1</a>       | tribbles homolog 1 (Drosophila)                                                                                  | 5.71               | 2.70E-05        |
| 244048_x_at         | <a href="#">DISC1</a>       | disrupted in schizophrenia 1                                                                                     | 5.67               | 1.59E-03        |
| 242170_at           | <a href="#">ZNF154</a>      | zinc finger protein 154                                                                                          | 5.60               | 3.58E-02        |
| 240558_at           | <a href="#">ROBO1</a>       | roundabout, axon guidance receptor, homolog 1 (Drosophila); similar to roundabout 1 isoform b                    | 5.57               | 4.40E-02        |
| 235739_at           | <a href="#">NR4A2</a>       | nuclear receptor subfamily 4, group A, member 2                                                                  | <b>5.28</b>        | <b>3.65E-02</b> |
| 208078_s_at         | <a href="#">SIK1</a>        | salt-inducible kinase 1                                                                                          | 5.23               | 2.12E-04        |
| 1560788_at          | <a href="#">MYO3B</a>       | myosin IIIB                                                                                                      | 4.97               | 4.31E-02        |
| 241796_x_at         | <a href="#">DIAPH2</a>      | diaphanous homolog 2 (Drosophila)                                                                                | 4.82               | 1.88E-03        |
| 232470_at           | <a href="#">SIK1</a>        | salt-inducible kinase 1                                                                                          | 4.74               | 3.89E-04        |
| 201739_at           | <a href="#">SGK1</a>        | serum/glucocorticoid regulated kinase 1                                                                          | 4.71               | 3.50E-05        |
| 1562250_at          | <a href="#">SEMA4D</a>      | sema domain, immunoglobulin domain (Ig), transmembrane domain (TM) and short cytoplasmic domain, (semaphorin) 4D | 4.68               | 3.20E-02        |
| 202241_at           | <a href="#">TRIB1</a>       | tribbles homolog 1 (Drosophila)                                                                                  | 4.62               | 9.82E-07        |
| 1561200_at          | <a href="#">VWA3B</a>       | von Willebrand factor A domain containing 3B                                                                     | 4.59               | 1.06E-02        |
| 239145_at           | <a href="#">ZNF414</a>      | zinc finger protein 414                                                                                          | 4.56               | 1.11E-03        |
| 220461_at           | <a href="#">PCNXL2</a>      | pecanex-like 2 (Drosophila)                                                                                      | 4.51               | 1.87E-04        |
| 200951_s_at         | <a href="#">CCND2</a>       | cyclin D2                                                                                                        | 4.45               | 2.03E-02        |
| 202340_x_at         | <a href="#">NR4A1</a>       | nuclear receptor subfamily 4, group A, member 1                                                                  | 4.23               | 1.95E-03        |
| 202388_at           | <a href="#">RGS2</a>        | regulator of G-protein signaling 2, 24kDa                                                                        | <b>4.01</b>        | <b>1.85E-04</b> |
| 217031_at           | <a href="#">KRT84</a>       | keratin 84                                                                                                       | 3.87               | 1.76E-02        |
| 202989_at           | <a href="#">RGS1</a>        | regulator of G-protein signaling 1                                                                               | 3.86               | 5.77E-03        |
| 1555585_a_at        | <a href="#">FAM71B</a>      | family with sequence similarity 71, member B                                                                     | 3.85               | 9.40E-04        |
| 241207_at           | <a href="#">MLK1</a>        | megakaryoblastic leukemia (translocation) 1                                                                      | 3.85               | 4.28E-02        |
| 218995_s_at         | <a href="#">EDN1</a>        | endothelin 1                                                                                                     | 3.75               | 2.60E-05        |
| 244025_at           | <a href="#">ITPR1</a>       | inositol 1,4,5-trisphosphate receptor interacting protein                                                        | 3.75               | 1.19E-04        |
| 226913_s_at         | <a href="#">SOX8</a>        | SRY (sex determining region Y)-box 8                                                                             | 3.73               | 3.48E-02        |
| 215635_at           | <a href="#">PDE8A</a>       | phosphodiesterase 8A                                                                                             | 3.68               | 3.66E-02        |
| 211143_x_at         | <a href="#">NR4A1</a>       | nuclear receptor subfamily 4, group A, member 1                                                                  | 3.61               | 1.17E-03        |
| 1564044_at          | <a href="#">KNCN</a>        | kinocilin                                                                                                        | 3.51               | 1.83E-02        |
| 232746_at           | <a href="#">CXCR7</a>       | chemokine (C-X-C motif) receptor 7                                                                               | 3.49               | 1.30E-05        |
| 241188_at           | <a href="#">IPCEF1</a>      | interaction protein for cytohesin exchange factors 1                                                             | 3.41               | 8.21E-03        |
| 235668_at           | <a href="#">PRDM1</a>       | PR domain containing 1, with ZNF domain                                                                          | 3.40               | 5.50E-05        |
| 239589_at           | <a href="#">RNF43</a>       | ring finger protein 43                                                                                           | 3.35               | 1.38E-02        |
| 233793_at           | <a href="#">ST6GALNAC5</a>  | ST6 (alpha-N-acetyl-neuraminy-2,3-beta-galactosyl-1,3)-N-acetylgalactosaminide alpha-2,6-sialyltransferase 5     | 3.33               | 1.47E-02        |
| 1557285_at          | <a href="#">AREG, AREGB</a> | amphiregulin; amphiregulin B                                                                                     | 3.32               | 1.77E-02        |
| 201044_x_at         | <a href="#">DUSP1</a>       | dual specificity phosphatase 1                                                                                   | <b>3.31</b>        | <b>2.80E-05</b> |
| 231961_at           | <a href="#">RBPMS</a>       | RNA binding protein with multiple splicing                                                                       | 3.28               | 1.03E-02        |
| 219243_at           | <a href="#">GIMAP4</a>      | GTPase, IMAP family member 4                                                                                     | 3.27               | 4.81E-02        |
| 237646_x_at         | <a href="#">PLEKHG5</a>     | pleckstrin homology domain containing, family G (with RhoGef domain) member 5                                    | 3.26               | 4.90E-02        |
| 201169_s_at         | <a href="#">BHLHE40</a>     | basic helix-loop-helix family, member e40                                                                        | 3.20               | 4.51E-03        |
| 227613_at           | <a href="#">ZNF331</a>      | zinc finger protein 331                                                                                          | 3.20               | 9.75E-04        |
| 233681_at           | <a href="#">KRTAP3-3</a>    | keratin associated protein 3-3                                                                                   | 3.19               | 4.42E-02        |
| 229039_at           | <a href="#">SYN2</a>        | synapsin II                                                                                                      | 3.15               | 3.28E-02        |
| 215289_at           | <a href="#">ZNF749</a>      | zinc finger protein 749                                                                                          | 3.13               | 6.95E-04        |
| 233127_at           | <a href="#">ZNF133</a>      | zinc finger protein 331                                                                                          | 3.12               | 4.66E-03        |
| 242085_at           | <a href="#">C2orf18</a>     | chromosome 2 open reading frame 18                                                                               | 3.09               | 1.86E-02        |
| 211794_at           | <a href="#">FYB</a>         | FYN binding protein                                                                                              | 3.08               | 3.37E-02        |
| 219228_at           | <a href="#">ZNF331</a>      | zinc finger protein 331                                                                                          | 3.06               | 1.70E-03        |
| 244503_at           | <a href="#">BDNF</a>        | brain-derived neurotrophic factor                                                                                | 3.04               | 3.87E-04        |
| 238987_at           | <a href="#">B4GALNT1</a>    | UDP-Gal:betaGlcNAc beta 1,4- galactosyltransferase, polypeptide 1                                                | 3.03               | 2.93E-03        |
| 234694_at           | <a href="#">CNTROB</a>      | centrobin, centrosomal BRCA2 interacting protein                                                                 | 3.03               | 4.37E-02        |

|                    |                        |                                                                                                   |             |                 |
|--------------------|------------------------|---------------------------------------------------------------------------------------------------|-------------|-----------------|
| 201170_s_at        | <i>BHLHE40</i>         | basic helix-loop-helix family, member e40                                                         | 3.01        | 5.84E-03        |
| 234243_at          | <i>RPF1</i>            | ribosome production factor 1 homolog (S. cerevisiae)                                              | 3.01        | 2.70E-05        |
| 222261_at          | <i>TLDC1</i>           | TBC/LysM-associated domain containing 1                                                           | 3.01        | 7.75E-03        |
| 242836_at          | <i>ATP1B3</i>          | ATPase, Na+/K+ transporting, beta 3 polypeptide                                                   | 2.96        | 2.99E-03        |
| 237194_at          | <i>TSPAN5</i>          | tetraspanin 5                                                                                     | 2.83        | 3.61E-02        |
| 231678_s_at        | <i>ADH4</i>            | alcohol dehydrogenase 4 (class II), pi polypeptide                                                | 2.79        | 1.74E-02        |
| 217616_at          | <i>SIK1</i>            | salt-inducible kinase 1                                                                           | 2.79        | 1.19E-02        |
| 1556287_a_at       | <i>C6orf182</i>        | chromosome 6 open reading frame 182                                                               | 2.75        | 4.92E-02        |
| 238051_x_at        | <i>PWWP2B</i>          | PWWP domain containing 2B                                                                         | 2.74        | 1.79E-02        |
| <b>220088_at</b>   | <b><i>CSAR1</i></b>    | <b>complement component 5a receptor 1</b>                                                         | <b>2.73</b> | <b>8.14E-03</b> |
| 1567575_at         | <i>BDNF</i>            | brain-derived neurotrophic factor                                                                 | 2.71        | 2.81E-02        |
| 1564160_at         | <i>DTHD1</i>           | death domain containing 1                                                                         | 2.64        | 1.91E-02        |
| 230333_at          | <i>SAT1</i>            | spermidine/spermine N1-acetyltransferase 1                                                        | 2.64        | 1.75E-02        |
| 205027_s_at        | <i>MAP3K8</i>          | mitogen-activated protein kinase kinase kinase 8                                                  | 2.61        | 7.00E-05        |
| 1561181_at         | <i>ARID5B</i>          | AT rich interactive domain 5B (MRF1-like)                                                         | 2.57        | 9.11E-03        |
| 1563040_s_at       | <i>LARGE-AS1</i>       | LARGE antisense RNA 1                                                                             | 2.57        | 4.46E-02        |
| 233309_at          | <i>TMEM2</i>           | transmembrane protein 2                                                                           | 2.57        | 1.20E-03        |
| 225582_at          | <i>ITPRIP</i>          | inositol 1,4,5-trisphosphate receptor interacting protein                                         | 2.51        | 4.61E-04        |
| 238317_x_at        | <i>RBMS1</i>           | RNA binding motif, single stranded interacting protein 1                                          | 2.49        | 2.66E-02        |
| 234854_at          | <i>MDN1</i>            | MDN1, midasin homolog (yeast)                                                                     | 2.47        | 6.93E-03        |
| 221062_at          | <i>HS3ST3B1</i>        | heparan sulfate (glucosamine) 3-O-sulfotransferase 3B1                                            | 2.45        | 3.50E-02        |
| 1552691_at         | <i>ARL11</i>           | ADP-ribosylation factor-like 11                                                                   | 2.42        | 3.66E-02        |
| 217425_at          | <i>MC2R</i>            | melanocortin 2 receptor (adrenocorticotrophic hormone)                                            | 2.41        | 3.05E-02        |
| 205239_at          | <i>AREG; AREGB</i>     | amphiregulin; amphiregulin B                                                                      | 2.40        | 3.52E-03        |
| 241518_at          | <i>HTR2C</i>           | 5-hydroxytryptamine (serotonin) receptor 2C                                                       | 2.38        | 3.17E-02        |
| 233136_at          | <i>PABPC5</i>          | poly(A) binding protein, cytoplasmic 5                                                            | 2.37        | 4.78E-02        |
| 209924_at          | <i>CCL18</i>           | chemokine (C-C motif) ligand 18 (pulmonary and activation-regulated); c-C motif chemokine 18-like | 2.36        | 2.54E-02        |
| 222802_at          | <i>EDN1</i>            | endothelin 1                                                                                      | 2.35        | 2.93E-03        |
| 201939_at          | <i>PLK2</i>            | polo-like kinase 2                                                                                | 2.35        | 7.96E-03        |
| 241691_at          | <i>SCARF2</i>          | scavenger receptor class F, member 2                                                              | 2.35        | 1.35E-02        |
| 210082_at          | <i>ABCA4</i>           | ATP-binding cassette, sub-family A (ABC1), member 4                                               | 2.34        | 1.41E-02        |
| 227337_at          | <i>ANKRD37</i>         | ankyrin repeat domain 37                                                                          | 2.34        | 4.65E-02        |
| 203313_s_at        | <i>TGIF1</i>           | TGFB-induced factor homeobox 1                                                                    | 2.31        | 4.19E-04        |
| 228962_at          | <i>PDE4D</i>           | phosphodiesterase 4D, cAMP-specific                                                               | 2.29        | 3.84E-02        |
| 210833_at          | <i>PTGER3</i>          | prostaglandin E receptor 3 (subtype EP3)                                                          | 2.29        | 3.27E-03        |
| 223801_s_at        | <i>APOL4</i>           | apolipoprotein L, 4                                                                               | 2.28        | 3.61E-02        |
| 1559987_at         | <i>MSI2</i>            | musashi homolog 2 (Drosophila)                                                                    | 2.28        | 1.48E-02        |
| 36711_at           | <i>MAFF</i>            | v-maf musculoaponeurotic fibrosarcoma oncogene homolog F (avian)                                  | 2.27        | 5.82E-04        |
| 230784_at          | <i>PRAC</i>            | prostate cancer susceptibility candidate                                                          | 2.27        | 9.55E-03        |
| 204491_at          | <i>PDE4D</i>           | phosphodiesterase 4D, cAMP-specific                                                               | 2.26        | 3.21E-02        |
| 238808_at          | <i>HOXA13</i>          | homeobox A13                                                                                      | 2.25        | 2.14E-03        |
| 214511_x_at        | <i>FCGR1B</i>          | Fc fragment of IgG, high affinity Ib, receptor (CD64)                                             | 2.22        | 1.52E-02        |
| 234855_at          | <i>ORF1</i>            | uncharacterized protein, clone pT-Adv JuaX22                                                      | 2.20        | 7.16E-03        |
| 1562301_at         | <i>C8orf34</i>         | chromosome 8 open reading frame 34                                                                | 2.19        | 4.45E-02        |
| 235614_at          | <i>TMEM151A</i>        | transmembrane protein 151A                                                                        | 2.19        | 1.83E-02        |
| 205193_at          | <i>MAFF</i>            | v-maf musculoaponeurotic fibrosarcoma oncogene homolog F (avian)                                  | 2.18        | 1.12E-03        |
| 210836_x_at        | <i>PDE4D</i>           | phosphodiesterase 4D, cAMP-specific                                                               | 2.18        | 2.94E-02        |
| 244026_at          | <i>ELL2</i>            | elongation factor, RNA polymerase II, 2                                                           | 2.17        | 1.14E-03        |
| <b>209582_s_at</b> | <b><i>CD200</i></b>    | <b>CD200 molecule</b>                                                                             | <b>2.16</b> | <b>2.14E-02</b> |
| 204011_at          | <i>SPRY2</i>           | sprouty homolog 2 (Drosophila)                                                                    | 2.16        | 2.68E-03        |
| 229424_s_at        | <i>ARHGAP27</i>        | Rho GTPase activating protein 27                                                                  | 2.15        | 2.75E-02        |
| 235592_at          | <i>ELL2</i>            | elongation factor, RNA polymerase II, 2                                                           | 2.14        | 1.35E-02        |
| 234097_s_at        | <i>ZNRD1-AS1</i>       | ZNRD1 antisense RNA 1                                                                             | 2.14        | 3.20E-02        |
| 202935_s_at        | <i>SOX9</i>            | SRY (sex determining region Y)-box 9                                                              | 2.13        | 1.98E-02        |
| 231445_at          | <i>PAX1</i>            | paired box 1                                                                                      | 2.12        | 1.09E-02        |
| 224039_at          | <i>FAM186B</i>         | family with sequence similarity 186, member B                                                     | 2.11        | 3.40E-03        |
| 242659_at          | <i>ELF4</i>            | E74-like factor 4 (ets domain transcription factor)                                               | 2.10        | 6.34E-02        |
| 218177_at          | <i>CHMP1B</i>          | charged multivesicular body protein 1B                                                            | 2.09        | 3.21E-03        |
| 222299_x_at        | <i>PEX13</i>           | peroxisomal biogenesis factor 13                                                                  | 2.09        | 7.95E-03        |
| 210632_s_at        | <i>SGCA</i>            | sarcoglycan, alpha (50kDa dystrophin-associated glycoprotein)                                     | 2.09        | 2.93E-03        |
| 1566901_at         | <i>TGIF1</i>           | TGFB-induced factor homeobox 1                                                                    | 2.07        | 5.22E-03        |
| <b>209583_s_at</b> | <b><i>CD200</i></b>    | <b>CD200 molecule</b>                                                                             | <b>2.06</b> | <b>1.85E-02</b> |
| 232756_at          | <i>KALRN</i>           | kalirin, RhoGEF kinase                                                                            | 2.06        | 1.59E-03        |
| 208960_s_at        | <i>KLF6</i>            | Kruppel-like factor 6                                                                             | 2.05        | 1.52E-03        |
| 1557459_at         | <i>SIK2</i>            | salt-inducible kinase 2                                                                           | 2.05        | 2.35E-02        |
| 218631_at          | <i>AVPI1</i>           | arginine vasopressin-induced 1                                                                    | 2.03        | 4.63E-03        |
| 233157_x_at        | <i>CCDC114</i>         | coiled-coil domain containing 114                                                                 | 2.03        | 3.04E-02        |
| 234792_x_at        | <i>IGHA1; IGHV4-31</i> | immunoglobulin heavy constant alpha 1; immunoglobulin heavy variable 4-31                         | 2.03        | 4.04E-02        |
| 237484_at          | <i>SMCO3</i>           | single-pass membrane protein with coiled-coil domains 3                                           | 2.03        | 6.08E-03        |
| 233979_s_at        | <i>ESPN</i>            | espin                                                                                             | 2.01        | 3.20E-02        |
| 243652_at          | <i>EYA2</i>            | eyes absent homolog 2 (Drosophila)                                                                | 2.01        | 9.63E-03        |

| <b>2h GS-5759</b>   |                                                     | <i>252 probe sets are listed corresponding to 152 DEGs</i>                                                      |                    |                 |
|---------------------|-----------------------------------------------------|-----------------------------------------------------------------------------------------------------------------|--------------------|-----------------|
| <b>Probe Set ID</b> | <b>Gene Symbol</b>                                  | <b>UniGene Name</b>                                                                                             | <b>Fold Change</b> | <b>P-Value</b>  |
| 209959_at           | <a href="#">NR4A3</a>                               | nuclear receptor subfamily 4, group A, member 3                                                                 | 77.25              | 2.70E-05        |
| 207978_s_at         | <a href="#">NR4A3</a>                               | nuclear receptor subfamily 4, group A, member 3                                                                 | 32.75              | 2.50E-05        |
| <b>216248_s_at</b>  | <b><a href="#">NR4A2</a></b>                        | <b>nuclear receptor subfamily 4, group A, member 2</b>                                                          | <b>25.22</b>       | <b>7.47E-04</b> |
| <b>204621_s_at</b>  | <b><a href="#">NR4A2</a></b>                        | <b>nuclear receptor subfamily 4, group A, member 2</b>                                                          | <b>24.66</b>       | <b>1.12E-03</b> |
| <b>204622_x_at</b>  | <b><a href="#">NR4A2</a></b>                        | <b>nuclear receptor subfamily 4, group A, member 2</b>                                                          | <b>22.74</b>       | <b>5.89E-04</b> |
| <b>203639_s_at</b>  | <b><a href="#">FGFR2</a></b>                        | <b>fibroblast growth factor receptor 2</b>                                                                      | <b>11.04</b>       | <b>4.25E-02</b> |
| 1556683_x_at        | <a href="#">AUTS2</a>                               | autism susceptibility candidate 2                                                                               | 10.41              | 4.97E-02        |
| 205207_at           | <a href="#">IL6</a>                                 | interleukin 6 (interferon, beta 2)                                                                              | 8.88               | 1.79E-03        |
| 234511_at           | <a href="#">ANKRD60</a>                             | ankyrin repeat domain 60                                                                                        | 8.56               | 1.84E-03        |
| 218541_s_at         | <a href="#">C8orf4</a>                              | chromosome 8 open reading frame 4                                                                               | 8.48               | 1.83E-02        |
| 232470_at           | <a href="#">SIK1</a>                                | salt-inducible kinase 1                                                                                         | 8.20               | 1.07E-04        |
| 206202_at           | <a href="#">MEOX2</a>                               | mesenchyme homeobox 2                                                                                           | 7.74               | 1.51E-03        |
| <b>211401_s_at</b>  | <b><a href="#">FGFR2</a></b>                        | <b>fibroblast growth factor receptor 2</b>                                                                      | <b>7.10</b>        | <b>1.79E-02</b> |
| <b>221541_at</b>    | <b><a href="#">CRISPLD2</a></b>                     | <b>cysteine-rich secretory protein LCCL domain containing 2</b>                                                 | <b>7.08</b>        | <b>3.10E-05</b> |
| 228964_at           | <a href="#">PRDM1</a>                               | PR domain containing 1, with ZNF domain                                                                         | 6.98               | 8.50E-05        |
| <b>203638_s_at</b>  | <b><a href="#">FGFR2</a></b>                        | <b>fibroblast growth factor receptor 2</b>                                                                      | <b>6.63</b>        | <b>3.43E-02</b> |
| 208078_s_at         | <a href="#">SIK1</a>                                | salt-inducible kinase 1                                                                                         | 6.35               | 1.10E-05        |
| 205476_at           | <a href="#">CCL20</a>                               | chemokine (C-C motif) ligand 20                                                                                 | 6.27               | 7.80E-04        |
| 228962_at           | <a href="#">PDE4D</a>                               | phosphodiesterase 4D, cAMP-specific                                                                             | 6.25               | 1.46E-03        |
| 236610_at           | <a href="#">PDE4D</a>                               | phosphodiesterase 4D, cAMP-specific (phosphodiesterase E3 dunce homolog, Drosophila)                            | 6.25               | 1.27E-03        |
| 217505_at           | <a href="#">KLHL23</a>                              | kelch-like family member 23                                                                                     | 6.08               | 1.97E-02        |
| 244586_x_at         | <a href="#">PARD3B</a>                              | par-3 partitioning defective 3 homolog B (C. elegans)                                                           | 5.97               | 4.21E-02        |
| 1557713_at          | <a href="#">DIS3L2</a>                              | DIS3 mitotic control homolog (S. cerevisiae)-like 2                                                             | 5.55               | 2.43E-03        |
| 201739_at           | <a href="#">SGK1</a>                                | serum/glucocorticoid regulated kinase 1                                                                         | 5.55               | 1.41E-04        |
| 204491_at           | <a href="#">PDE4D</a>                               | phosphodiesterase 4D, cAMP-specific                                                                             | 5.47               | 5.79E-04        |
| <b>206359_at</b>    | <b><a href="#">SOCS3</a></b>                        | <b>suppressor of cytokine signaling 3</b>                                                                       | <b>5.46</b>        | <b>1.33E-02</b> |
| <b>209582_s_at</b>  | <b><a href="#">CD200</a></b>                        | <b>CD200 molecule</b>                                                                                           | <b>5.44</b>        | <b>1.98E-04</b> |
| 241099_at           | <a href="#">RLP4</a>                                | elongation protein 4 homolog (S. cerevisiae)                                                                    | 5.30               | 1.07E-02        |
| 210837_s_at         | <a href="#">PDE4D</a>                               | phosphodiesterase 4D, cAMP-specific                                                                             | 5.19               | 4.66E-04        |
| 230081_at           | <a href="#">PLCXD3</a>                              | phosphatidylinositol-specific phospholipase C, X domain containing 3                                            | 5.17               | 2.33E-02        |
| <b>227697_at</b>    | <b><a href="#">SOCS3</a></b>                        | <b>suppressor of cytokine signaling 3</b>                                                                       | <b>5.11</b>        | <b>3.20E-03</b> |
| 244025_at           | <a href="#">ITPRIP</a>                              | inositol 1,4,5-trisphosphate receptor interacting protein                                                       | 5.10               | 2.70E-05        |
| 235841_at           | <a href="#">MAML3</a>                               | mastermind-like 3 (Drosophila)                                                                                  | 5.09               | 1.15E-03        |
| 211143_x_at         | <a href="#">NR4A1</a>                               | nuclear receptor subfamily 4, group A, member 1                                                                 | 5.02               | 3.42E-04        |
| 207038_at           | <a href="#">SLC16A6</a>                             | solute carrier family 16, member 6 (monocarboxylic acid transporter 7)                                          | 5.00               | 1.16E-02        |
| 209774_x_at         | <a href="#">CXCL2</a>                               | chemokine (C-X-C motif) ligand 2                                                                                | 4.98               | 5.49E-03        |
| 210836_x_at         | <a href="#">PDE4D</a>                               | phosphodiesterase 4D, cAMP-specific                                                                             | 4.70               | 1.37E-03        |
| 243486_at           | <a href="#">SND1</a>                                | staphylococcal nuclease and tudor domain containing 1                                                           | 4.51               | 8.60E-05        |
| 202340_x_at         | <a href="#">NR4A1</a>                               | nuclear receptor subfamily 4, group A, member 1                                                                 | 4.42               | 7.52E-04        |
| 210997_at           | <a href="#">HGF</a>                                 | hepatocyte growth factor (hepapoietin A; scatter factor)                                                        | 4.41               | 3.53E-02        |
| <b>220088_at</b>    | <b><a href="#">CSAR1</a></b>                        | <b>complement component 5a receptor 1</b>                                                                       | <b>4.26</b>        | <b>2.40E-05</b> |
| 225582_at           | <a href="#">ITPRIP</a>                              | inositol 1,4,5-trisphosphate receptor interacting protein                                                       | 4.25               | 5.00E-06        |
| 239604_at           | <a href="#">RBMS3</a>                               | RNA binding motif, single stranded interacting protein                                                          | 4.17               | 8.32E-03        |
| <b>209583_s_at</b>  | <b><a href="#">CD200</a></b>                        | <b>CD200 molecule</b>                                                                                           | <b>4.12</b>        | <b>4.48E-04</b> |
| 230333_at           | <a href="#">SAT1</a>                                | spermidine/spermine N1-acetyltransferase 1                                                                      | 4.12               | 1.95E-03        |
| 230748_at           | <a href="#">SLC16A6</a>                             | solute carrier family 16, member 6 (monocarboxylic acid transporter 7)                                          | 4.03               | 1.56E-02        |
| 227613_at           | <a href="#">ZNF331</a>                              | zinc finger protein 331                                                                                         | 4.03               | 7.40E-05        |
| 203548_s_at         | <a href="#">LPL</a>                                 | lipoprotein lipase                                                                                              | 3.88               | 1.79E-02        |
| 237479_at           | <a href="#">SPAG16</a>                              | sperm associated antigen 16                                                                                     | 3.84               | 3.46E-02        |
| 239367_at           | <a href="#">BDNF</a>                                | brain-derived neurotrophic factor                                                                               | 3.83               | 1.07E-03        |
| 228128_x_at         | <a href="#">PAPPA</a>                               | pregnancy-associated plasma protein A, pappalysin 1                                                             | 3.81               | 3.00E-05        |
| 203549_s_at         | <a href="#">LPL</a>                                 | lipoprotein lipase                                                                                              | 3.80               | 1.14E-02        |
| 234419_x_at         | <a href="#">IGHA1; IGHG1; IGHG3; IGHM; IGHV4-31</a> | immunoglobulin heavy constant alpha 1; gamma 1 (G1m marker); gamma 3 (G3m marker); mu; heavy variable 4-31      | 3.79               | 8.69E-03        |
| 206382_s_at         | <a href="#">BDNF</a>                                | brain-derived neurotrophic factor                                                                               | 3.78               | 8.78E-04        |
| 239818_x_at         | <a href="#">TRIB1</a>                               | tribbles homolog 1 (Drosophila)                                                                                 | 3.78               | 1.42E-04        |
| 206546_at           | <a href="#">SYCP2</a>                               | synaptonemal complex protein 2                                                                                  | 3.77               | 2.89E-02        |
| 224828_at           | <a href="#">CPEB4</a>                               | cytoplasmic polyadenylation element binding protein 4                                                           | 3.76               | 6.52E-04        |
| 219682_s_at         | <a href="#">TBX3</a>                                | T-box 3                                                                                                         | 3.73               | 1.00E-05        |
| 202241_at           | <a href="#">TRIB1</a>                               | tribbles homolog 1 (Drosophila)                                                                                 | 3.72               | 6.40E-05        |
| 237593_at           | <a href="#">MNAT1</a>                               | menage a trois homolog 1, cyclin H assembly factor (Xenopus laevis)                                             | 3.71               | 1.59E-02        |
| 1552908_at          | <a href="#">GCSAML</a>                              | germinal center-associated, signaling and motility-like                                                         | 3.68               | 5.65E-03        |
| 219228_at           | <a href="#">ZNF331</a>                              | zinc finger protein 331                                                                                         | 3.65               | 1.11E-04        |
| 209631_s_at         | <a href="#">GPR37; SEL1L2</a>                       | G protein-coupled receptor 37 (endothelin receptor type B-like); sel-1 suppressor of lin-12-like 2 (C. elegans) | 3.62               | 1.50E-05        |
| 218177_at           | <a href="#">CHMP1B</a>                              | charged multivesicular body protein 1B                                                                          | 3.60               | 8.40E-04        |
| <b>202388_at</b>    | <b><a href="#">RGS2</a></b>                         | <b>regulator of G-protein signaling 2, 24kDa</b>                                                                | <b>3.59</b>        | <b>2.39E-04</b> |
| 242840_at           | <a href="#">DAB1</a>                                | disabled homolog 1 (Drosophila)                                                                                 | 3.56               | 4.04E-02        |
| 220483_s_at         | <a href="#">RNF19A</a>                              | ring finger protein 19A, E3 ubiquitin protein ligase                                                            | 3.56               | 1.79E-03        |
| 1564718_at          | <a href="#">ZHX2</a>                                | zinc fingers and homeoboxes 2                                                                                   | 3.56               | 4.55E-02        |
| 229552_at           | <a href="#">HRK; LOC283454</a>                      | harakiri, BCL2 interacting protein (contains only BH3 domain); uncharacterized LOC283454                        | 3.55               | 3.84E-03        |
| 229709_at           | <a href="#">ATP1B3</a>                              | ATPase, Na <sup>+</sup> /K <sup>+</sup> transporting, beta 3 polypeptide                                        | 3.52               | 6.24E-03        |
| 213006_at           | <a href="#">CEBPD</a>                               | CCAAT/enhancer binding protein (C/EBP), delta                                                                   | 3.50               | 5.31E-03        |

|                    |                 |                                                                                                                                           |             |                 |
|--------------------|-----------------|-------------------------------------------------------------------------------------------------------------------------------------------|-------------|-----------------|
| <b>208228_s_at</b> | <b>FGFR2</b>    | <b>fibroblast growth factor receptor 2</b>                                                                                                | <b>3.49</b> | <b>4.86E-02</b> |
| 1567656_at         | OR2H1           | olfactory receptor, family 2, subfamily H, member 1                                                                                       | 3.49        | 2.37E-02        |
| 1569042_at         | LRP1            | low density lipoprotein receptor-related protein 1                                                                                        | 3.48        | 3.93E-03        |
| 224940_s_at        | PAPPA           | pregnancy-associated plasma protein A, pappalysin 1                                                                                       | 3.47        | 3.00E-06        |
| 224942_at          | PAPPA           | pregnancy-associated plasma protein A, pappalysin 1                                                                                       | 3.45        | 8.23E-04        |
| 205239_at          | AREG; AREGB     | amphiregulin; amphiregulin B                                                                                                              | 3.44        | 4.41E-04        |
| 206865_at          | HRK             | harakiri, BCL2 interacting protein (contains only BH3 domain)                                                                             | 3.43        | 3.43E-03        |
| 224831_at          | CPEB4           | cytoplasmic polyadenylation element binding protein 4                                                                                     | 3.35        | 1.14E-04        |
| 224941_at          | PAPPA           | pregnancy-associated plasma protein A, pappalysin 1                                                                                       | 3.33        | 4.20E-05        |
| 224829_at          | CPEB4           | cytoplasmic polyadenylation element binding protein 4                                                                                     | 3.30        | 1.66E-04        |
| 201981_at          | PAPPA           | pregnancy-associated plasma protein A, pappalysin 1                                                                                       | 3.29        | 6.41E-04        |
| 219316_s_at        | FLVCR2          | feline leukemia virus subgroup C cellular receptor family, member 2                                                                       | 3.24        | 2.97E-02        |
| 228325_at          | SPDR            | Scaffolding Protein Involved In DNA Repair                                                                                                | 3.22        | 6.70E-03        |
| 242009_at          | SLC6A4          | solute carrier family 6 (neurotransmitter transporter, serotonin), member 4                                                               | 3.20        | 3.63E-03        |
| 238987_at          | B4GALT1         | UDP-Gal:betaGlcNAc beta 1,4- galactosyltransferase, polypeptide 1                                                                         | 3.13        | 5.37E-03        |
| 218995_s_at        | EDN1            | endothelin 1                                                                                                                              | 3.04        | 3.60E-05        |
| 218178_s_at        | CHMP1B          | charged multivesicular body protein 1B                                                                                                    | 3.03        | 8.44E-04        |
| 204456_s_at        | GAS1            | growth arrest-specific 1                                                                                                                  | 3.01        | 2.52E-02        |
| 205027_s_at        | MAP3K8          | mitogen-activated protein kinase kinase kinase 8                                                                                          | 2.99        | 4.00E-06        |
| 1559141_s_at       | FAM87A; FAM87B  | family with sequence similarity 87, member A; family with sequence similarity 87, member B                                                | 2.98        | 5.59E-03        |
| 209355_s_at        | PPAP2B          | phosphatidic acid phosphatase type 2B                                                                                                     | 2.97        | 7.44E-04        |
| 1557285_at         | AREG, AREGB     | amphiregulin; amphiregulin B                                                                                                              | 2.96        | 1.20E-02        |
| 225606_at          | BCL2L11         | BCL2-like 11 (apoptosis facilitator)                                                                                                      | 2.95        | 2.87E-02        |
| 230986_at          | KLF8            | Kruppel-like factor 8                                                                                                                     | 2.94        | 4.73E-02        |
| 227337_at          | ANKRD37         | ankyrin repeat domain 37                                                                                                                  | 2.91        | 1.84E-03        |
| 225516_at          | SLC7A2          | solute carrier family 7 (cationic amino acid transporter, y+ system), member 2                                                            | 2.91        | 1.30E-05        |
| 212977_at          | CXCR7           | chemokine (C-X-C motif) receptor 7                                                                                                        | 2.90        | 2.63E-02        |
| 205466_s_at        | HS3ST1          | heparan sulfate (glucosamine) 3-O-sulfotransferase 1                                                                                      | 2.90        | 3.94E-02        |
| 216236_s_at        | SLC2A14; SLC2A3 | solute carrier family 2 (facilitated glucose transporter), member 14; solute carrier family 2 (facilitated glucose transporter), member 3 | 2.88        | 1.24E-03        |
| 205193_at          | MAFF            | v-maf musculoaponeurotic fibrosarcoma oncogene homolog F (avian)                                                                          | 2.85        | 4.50E-05        |
| 1553036_at         | GPR111          | G protein-coupled receptor 111                                                                                                            | 2.82        | 4.99E-02        |
| 203984_s_at        | CASP9           | caspase 9, apoptosis-related cysteine peptidase                                                                                           | 2.81        | 4.74E-03        |
| 36711_at           | MAFF            | v-maf musculoaponeurotic fibrosarcoma oncogene homolog F (avian)                                                                          | 2.81        | 4.00E-05        |
| 224917_at          | MIR21           | microRNA 21                                                                                                                               | 2.79        | 6.16E-03        |
| 222802_at          | EDN1            | endothelin 1                                                                                                                              | 2.78        | 1.21E-04        |
| 225544_at          | TBX3            | T-box 3                                                                                                                                   | 2.77        | 5.10E-05        |
| 227443_at          | LURAP1L         | leucine rich adaptor protein 1-like                                                                                                       | 2.76        | 1.86E-02        |
| 226614_s_at        | FAM167A         | family with sequence similarity 167, member A                                                                                             | 2.75        | 1.41E-04        |
| 225987_at          | STEAP4          | STEAP family member 4                                                                                                                     | 2.73        | 1.74E-02        |
| 241340_at          | CASP4           | caspase 4, apoptosis-related cysteine peptidase                                                                                           | 2.72        | 1.19E-02        |
| 236911_at          | RIMKLB          | ribosomal modification protein rimK-like family member B                                                                                  | 2.72        | 1.31E-03        |
| 244277_at          | SH3YL1          | SH3 domain containing, Ysc84-like 1 (S. cerevisiae)                                                                                       | 2.71        | 2.83E-02        |
| 1567303_at         | CDC14A          | CDC14 cell division cycle 14 homolog A (S. cerevisiae)                                                                                    | 2.68        | 2.01E-02        |
| 228187_at          | GAS1            | growth arrest-specific 1                                                                                                                  | 2.68        | 3.71E-02        |
| 202497_x_at        | SLC2A3          | solute carrier family 2 (facilitated glucose transporter), member 3                                                                       | 2.68        | 1.38E-03        |
| 223484_at          | C15orf48        | chromosome 15 open reading frame 48                                                                                                       | 2.67        | 1.03E-02        |
| 216627_s_at        | B4GALT1         | UDP-Gal:betaGlcNAc beta 1,4- galactosyltransferase, polypeptide 1                                                                         | 2.66        | 6.77E-03        |
| 212226_s_at        | PPAP2B          | phosphatidic acid phosphatase type 2B                                                                                                     | 2.65        | 9.57E-04        |
| 235668_at          | PRDM1           | PR domain containing 1, with ZNF domain                                                                                                   | 2.65        | 1.48E-02        |
| 218880_at          | FOSL2           | FOS-like antigen 2                                                                                                                        | 2.64        | 2.44E-04        |
| 1553133_at         | C9orf72         | chromosome 9 open reading frame 72                                                                                                        | 2.63        | 4.38E-04        |
| 214438_at          | HLX             | H2.0-like homeobox                                                                                                                        | 2.63        | 2.30E-03        |
| 242870_at          | RIMKLB          | ribosomal modification protein rimK-like family member B                                                                                  | 2.61        | 1.88E-03        |
| 229004_at          | ADAMTS15        | ADAM metallopeptidase with thrombospondin type 1 motif, 15                                                                                | 2.60        | 1.40E-02        |
| 227099_s_at        | C11orf96        | chromosome 11 open reading frame 96                                                                                                       | 2.59        | 8.32E-03        |
| 202499_s_at        | SLC2A3          | solute carrier family 2 (facilitated glucose transporter), member 3                                                                       | 2.59        | 1.61E-03        |
| 210775_x_at        | CASP9           | caspase 9, apoptosis-related cysteine peptidase                                                                                           | 2.58        | 5.36E-03        |
| 209101_at          | CTGF            | connective tissue growth factor                                                                                                           | 2.56        | 7.20E-05        |
| 237187_at          | HRK             | harakiri, BCL2 interacting protein (contains only BH3 domain)                                                                             | 2.55        | 8.35E-03        |
| 235421_at          | MAP3K8          | mitogen-activated protein kinase kinase kinase 8                                                                                          | 2.55        | 3.44E-03        |
| 231035_s_at        | OTUD1           | OTU domain containing 1                                                                                                                   | 2.55        | 8.13E-04        |
| 231367_s_at        | FNDC3A          | fibronectin type III domain containing 3A                                                                                                 | 2.54        | 1.46E-03        |
| 223379_s_at        | LATS2           | large tumor suppressor kinase 2                                                                                                           | 2.54        | 9.70E-03        |
| 217616_at          | SIK1            | salt-inducible kinase 1                                                                                                                   | 2.54        | 1.84E-02        |
| 222088_s_at        | SLC2A14; SLC2A3 | solute carrier family 2 (facilitated glucose transporter), member 14; solute carrier family 2 (facilitated glucose transporter), member 3 | 2.54        | 1.39E-03        |
| 1558143_a_at       | BCL2L11         | BCL2-like 11 (apoptosis facilitator)                                                                                                      | 2.53        | 2.78E-02        |
| 239123_at          | TSC22D1         | TSC22 domain family, member 1                                                                                                             | 2.52        | 4.00E-03        |
| 224797_at          | ARRDC3          | arrestin domain containing 3                                                                                                              | 2.51        | 4.93E-02        |
| 218631_at          | AVPI1           | arginine vasopressin-induced 1                                                                                                            | 2.50        | 8.90E-05        |
| 229720_at          | BAG1            | BCL2-associated athanogene                                                                                                                | 2.49        | 1.64E-02        |
| 203795_s_at        | BCL7A           | B-cell CLL/lymphoma 7A                                                                                                                    | 2.49        | 4.06E-03        |
| 227188_at          | EVA1C           | eva-1 homolog C (C. elegans)                                                                                                              | 2.49        | 4.17E-02        |
| 218881_s_at        | FOSL2           | FOS-like antigen 2                                                                                                                        | 2.49        | 2.61E-04        |
| 212099_at          | RHOB            | ras homolog family member B                                                                                                               | 2.49        | 2.63E-03        |
| 240845_at          | EVI5            | ecotropic viral integration site 5                                                                                                        | 2.48        | 1.27E-02        |



|                    |                     |                                                                                     |             |                 |
|--------------------|---------------------|-------------------------------------------------------------------------------------|-------------|-----------------|
| 212230_at          | <i>PPAP2B</i>       | phosphatidic acid phosphatase type 2B                                               | 2.48        | 1.47E-03        |
| 223085_at          | <i>RNF19A</i>       | ring finger protein 19A, E3 ubiquitin protein ligase                                | 2.48        | 1.54E-03        |
| 237252_at          | <i>THBD</i>         | thrombomodulin                                                                      | 2.48        | 6.28E-03        |
| 215111_s_at        | <i>TSC22D1</i>      | TSC22 domain family, member 1                                                       | 2.47        | 9.28E-03        |
| 237512_at          | <i>NAV2</i>         | neuron navigator 2                                                                  | 2.46        | 4.92E-04        |
| 202498_s_at        | <i>SLC2A3</i>       | solute carrier family 2 (facilitated glucose transporter), member 3                 | 2.46        | 2.29E-03        |
| 237451_x_at        | <i>CASP9</i>        | caspase 9, apoptosis-related cysteine peptidase                                     | 2.45        | 1.16E-02        |
| 214446_at          | <i>ELL2</i>         | elongation factor, RNA polymerase II, 2                                             | 2.45        | 2.20E-03        |
| 224325_at          | <i>FZD8</i>         | frizzled family receptor 8                                                          | 2.45        | 2.03E-02        |
| 203574_at          | <i>NFIL3</i>        | nuclear factor, interleukin 3 regulated                                             | 2.45        | 1.62E-02        |
| 1553962_s_at       | <i>RHOB</i>         | ras homolog family member B                                                         | 2.45        | 2.04E-03        |
| 1568644_at         | <i>ZNF208</i>       | zinc finger protein 208                                                             | 2.45        | 2.04E-02        |
| 215990_s_at        | <i>BCL6</i>         | B-cell CLL/lymphoma 6                                                               | 2.43        | 4.29E-03        |
| 205409_at          | <i>FOSL2</i>        | FOS-like antigen 2                                                                  | 2.43        | 3.90E-04        |
| 218723_s_at        | <i>RGCC</i>         | regulator of cell cycle                                                             | 2.42        | 4.14E-03        |
| 203796_s_at        | <i>BCL7A</i>        | B-cell CLL/lymphoma 7A                                                              | 2.39        | 5.89E-03        |
| 202723_s_at        | <i>FOXO1</i>        | forkhead box O1                                                                     | 2.38        | 2.96E-02        |
| 239461_at          | <i>GALNT15</i>      | UDP-N-acetyl-alpha-D-galactosamine:polypeptide N-acetylgalactosaminyltransferase 15 | 2.38        | 3.00E-02        |
| 214586_at          | <i>GPR37</i>        | G protein-coupled receptor 37 (endothelin receptor type B-like)                     | 2.38        | 6.43E-04        |
| 209681_at          | <i>SLC19A2</i>      | solute carrier family 19 (thiamine transporter), member 2                           | 2.38        | 1.45E-04        |
| 220335_x_at        | <i>CES3</i>         | carboxylesterase 3                                                                  | 2.37        | 3.81E-03        |
| 1555585_a_at       | <i>FAM71B</i>       | family with sequence similarity 71, member B                                        | 2.37        | 6.79E-03        |
| 233379_at          | <i>PRR5L</i>        | proline rich 5 like                                                                 | 2.37        | 2.66E-03        |
| 224480_s_at        | <i>AGPAT9</i>       | 1-acylglycerol-3-phosphate O-acyltransferase 9                                      | 2.36        | 8.71E-03        |
| 208536_s_at        | <i>BCL2L11</i>      | BCL2-like 11 (apoptosis facilitator)                                                | 2.36        | 3.98E-02        |
| 222015_at          | <i>CSNK1E</i>       | casein kinase 1, epsilon                                                            | 2.36        | 4.39E-04        |
| 209480_at          | <i>HLA-DQB1</i>     | major histocompatibility complex, class II, DQ beta 1                               | 2.36        | 7.92E-03        |
| 243969_at          | <i>SLC24A4</i>      | solute carrier family 24 (sodium/potassium/calcium exchanger), member 4             | 2.36        | 3.76E-03        |
| 1553613_s_at       | <i>FOXO1</i>        | forkhead box C1                                                                     | 2.34        | 1.11E-03        |
| 214520_at          | <i>FOXO2</i>        | forkhead box C2 (MFH-1, mesenchyme forkhead 1)                                      | 2.34        | 9.33E-03        |
| 207626_s_at        | <i>SLC7A2</i>       | solute carrier family 7 (cationic amino acid transporter, y+ system), member 2      | 2.34        | 6.74E-04        |
| 203313_s_at        | <i>TGIF1</i>        | TGF-beta-induced factor homeobox 1                                                  | 2.34        | 2.38E-04        |
| 228834_at          | <i>TOB1</i>         | transducer of ERBB2, 1                                                              | 2.34        | 3.50E-05        |
| 244503_at          | <i>BDNF</i>         | brain-derived neurotrophic factor                                                   | 2.33        | 8.83E-04        |
| 208250_s_at        | <i>DMBT1</i>        | deleted in malignant brain tumors 1                                                 | 2.33        | 4.81E-03        |
| 226858_at          | <i>CSNK1E</i>       | casein kinase 1, epsilon                                                            | 2.32        | 8.99E-04        |
| 210136_at          | <i>MBP</i>          | myelin basic protein                                                                | 2.30        | 3.58E-04        |
| 209772_s_at        | <i>CD24</i>         | CD24 molecule                                                                       | 2.29        | 3.64E-02        |
| 237978_at          | <i>COL8A1</i>       | collagen, type VIII, alpha 1                                                        | 2.29        | 1.19E-02        |
| 201169_s_at        | <i>BHLHE40</i>      | basic helix-loop-helix family, member e40                                           | 2.27        | 5.23E-03        |
| 1555777_at         | <i>POSTN</i>        | periostin, osteoblast specific factor                                               | 2.27        | 5.36E-03        |
| 200771_s_at        | <i>PTP4A1</i>       | protein tyrosine phosphatase type IVA, member 1                                     | 2.27        | 6.40E-03        |
| 1554544_a_at       | <i>MBP</i>          | myelin basic protein                                                                | 2.26        | 8.44E-04        |
| 210409_at          | <i>MLLT4-AS1</i>    | MLLT4 antisense RNA 1 (head to head)                                                | 2.26        | 1.16E-03        |
| 219737_s_at        | <i>PCDH9</i>        | protocadherin 9                                                                     | 2.26        | 4.62E-02        |
| 208606_s_at        | <i>WNT4</i>         | wingless-type MMTV integration site family, member 4                                | 2.26        | 1.44E-03        |
| 202023_at          | <i>EFNA1</i>        | ephrin-A1                                                                           | 2.24        | 1.74E-04        |
| 241404_at          | <i>EPHA5</i>        | EPH receptor A5                                                                     | 2.22        | 2.76E-04        |
| 205896_at          | <i>SLC22A4</i>      | solute carrier family 22 (organic cation/ergothioneine transporter), member 4       | 2.22        | 1.04E-02        |
| 237006_at          | <i>AFF1</i>         | AF4/FMR2 family, member 1                                                           | 2.21        | 3.43E-04        |
| 225407_at          | <i>MBP</i>          | myelin basic protein                                                                | 2.21        | 1.19E-04        |
| 231798_at          | <i>NOG</i>          | noggin                                                                              | 2.21        | 3.11E-03        |
| 203888_at          | <i>THBD</i>         | thrombomodulin                                                                      | 2.21        | 3.88E-03        |
| 228188_at          | <i>FOSL2</i>        | FOS-like antigen 2                                                                  | 2.20        | 2.02E-04        |
| 213221_s_at        | <i>SIK2</i>         | salt-inducible kinase 2                                                             | 2.20        | 2.71E-03        |
| 203140_at          | <i>BCL6</i>         | B-cell CLL/lymphoma 6                                                               | 2.19        | 9.44E-03        |
| 222343_at          | <i>BCL2L11</i>      | BCL2-like 11 (apoptosis facilitator)                                                | 2.18        | 2.98E-02        |
| 244026_at          | <i>ELL2</i>         | elongation factor, RNA polymerase II, 2                                             | 2.18        | 1.72E-02        |
| 225262_at          | <i>FOSL2</i>        | FOS-like antigen 2                                                                  | 2.18        | 8.70E-05        |
| 202149_at          | <i>NEDD9</i>        | neural precursor cell expressed, developmentally down-regulated 9                   | 2.18        | 3.65E-02        |
| 217584_at          | <i>NPC1</i>         | Niemann-Pick disease, type C1                                                       | 2.18        | 3.83E-04        |
| 211631_x_at        | <i>B4GALT1</i>      | UDP-Gal:betaGlcNAc beta 1,4-galactosyltransferase, polypeptide 1                    | 2.17        | 6.10E-03        |
| 224572_s_at        | <i>IRF2BP2</i>      | interferon regulatory factor 2 binding protein 2                                    | 2.17        | 2.09E-02        |
| 225955_at          | <i>METRNL</i>       | meteorin, glial cell differentiation regulator-like                                 | 2.17        | 6.43E-03        |
| 203887_s_at        | <i>THBD</i>         | thrombomodulin                                                                      | 2.17        | 2.88E-03        |
| 1569003_at         | <i>VMP1</i>         | vacuole membrane protein 1                                                          | 2.17        | 1.19E-02        |
| 201170_s_at        | <i>BHLHE40</i>      | basic helix-loop-helix family, member e40                                           | 2.15        | 1.83E-03        |
| <b>201044_x_at</b> | <b><i>DUSP1</i></b> | <b>dual specificity phosphatase 1</b>                                               | <b>2.14</b> | <b>3.21E-04</b> |
| 202768_at          | <i>FOSB</i>         | FBJ murine osteosarcoma viral oncogene homolog B                                    | 2.14        | 1.71E-02        |
| 201473_at          | <i>JUNB</i>         | jun B proto-oncogene                                                                | 2.14        | 4.79E-02        |
| 228293_at          | <i>DEPDC7</i>       | DEP domain containing 7                                                             | 2.13        | 1.00E-02        |
| 213260_at          | <i>FOXO1</i>        | forkhead box C1                                                                     | 2.13        | 1.85E-03        |
| 219433_at          | <i>BCOR</i>         | BCL6 corepressor                                                                    | 2.12        | 1.38E-02        |
| 216598_s_at        | <i>CCL2</i>         | chemokine (C-C motif) ligand 2                                                      | 2.12        | 7.52E-03        |
| 238432_at          | <i>DLGAP1-AS1</i>   | DLGAP1 antisense RNA 1                                                              | 2.12        | 4.50E-03        |
| 202150_s_at        | <i>NEDD9</i>        | neural precursor cell expressed, developmentally down-regulated 9                   | 2.12        | 2.74E-02        |
| 226140_s_at        | <i>OTUD1</i>        | OTU domain containing 1                                                             | 2.12        | 8.22E-03        |

|             |                          |                                                                               |      |          |
|-------------|--------------------------|-------------------------------------------------------------------------------|------|----------|
| 204654_s_at | <a href="#">TFAP2A</a>   | transcription factor AP-2 alpha (activating enhancer binding protein 2 alpha) | 2.12 | 4.98E-04 |
| 1567575_at  | <a href="#">BDNF</a>     | brain-derived neurotrophic factor                                             | 2.11 | 6.43E-03 |
| 225999_at   | <a href="#">RIMKLB</a>   | ribosomal modification protein rimK-like family member B                      | 2.10 | 2.51E-04 |
| 223566_s_at | <a href="#">BCOR</a>     | BCL6 corepressor                                                              | 2.09 | 1.01E-02 |
| 204602_at   | <a href="#">DKK1</a>     | dickkopf WNT signaling pathway inhibitor 1                                    | 2.09 | 9.02E-03 |
| 207826_s_at | <a href="#">ID3</a>      | inhibitor of DNA binding 3, dominant negative helix-loop-helix protein        | 2.09 | 2.73E-02 |
| 223430_at   | <a href="#">SIK2</a>     | salt-inducible kinase 2                                                       | 2.09 | 6.67E-03 |
| 201925_s_at | <a href="#">CD55</a>     | CD55 molecule, decay accelerating factor for complement (Cromer blood group)  | 2.08 | 7.31E-04 |
| 229889_at   | <a href="#">FAM211A</a>  | family with sequence similarity 211, member A                                 | 2.08 | 9.43E-04 |
| 217371_s_at | <a href="#">IL15</a>     | interleukin 15                                                                | 2.08 | 3.39E-04 |
| 226444_at   | <a href="#">SLC39A10</a> | solute carrier family 39 (zinc transporter), member 10                        | 2.07 | 1.18E-02 |
| 231067_s_at | <a href="#">AKAP12</a>   | A kinase (PRKA) anchor protein 12                                             | 2.06 | 5.27E-03 |
| 206864_s_at | <a href="#">HRK</a>      | harakiri, BCL2 interacting protein (contains only BH3 domain)                 | 2.06 | 6.55E-03 |
| 235085_at   | <a href="#">SGK223</a>   | homolog of rat pragra of Rnd2                                                 | 2.06 | 3.77E-03 |
| 202935_s_at | <a href="#">SOX9</a>     | SRY (sex determining region Y)-box 9                                          | 2.06 | 1.16E-02 |
| 228284_at   | <a href="#">TLE1</a>     | transducin-like enhancer of split 1 (E(sp1) homolog, Drosophila)              | 2.06 | 2.10E-02 |
| 205177_at   | <a href="#">TNNT1</a>    | troponin I type 1 (skeletal, slow)                                            | 2.06 | 2.02E-02 |
| 204014_at   | <a href="#">DUSP4</a>    | dual specificity phosphatase 4                                                | 2.05 | 1.22E-04 |
| 1566901_at  | <a href="#">TGIF1</a>    | TGFB-induced factor homeobox 1                                                | 2.05 | 1.82E-03 |
| 226575_at   | <a href="#">ZNF462</a>   | zinc finger protein 462                                                       | 2.05 | 3.73E-04 |
| 242836_at   | <a href="#">ATP1B3</a>   | ATPase, Na <sup>+</sup> /K <sup>+</sup> transporting, beta 3 polypeptide      | 2.04 | 1.66E-02 |
| 223916_s_at | <a href="#">BCOR</a>     | BCL6 corepressor                                                              | 2.04 | 1.72E-02 |
| 1569153_at  | <a href="#">GRAMD4</a>   | GRAM domain containing 4                                                      | 2.04 | 6.51E-03 |
| 226034_at   | <a href="#">DUSP4</a>    | dual specificity phosphatase 4                                                | 2.02 | 7.70E-05 |
| 217875_s_at | <a href="#">PMEPA1</a>   | prostate transmembrane protein, androgen induced 1                            | 2.02 | 4.53E-02 |
| 215992_s_at | <a href="#">RAPGEF2</a>  | Rap guanine nucleotide exchange factor (GEF) 2                                | 2.02 | 8.45E-03 |
| 236352_at   | <a href="#">VGLL2</a>    | vestigial like 2 (Drosophila)                                                 | 2.02 | 1.46E-02 |
| 206035_at   | <a href="#">REL</a>      | v-rel reticuloendotheliosis viral oncogene homolog (avian)                    | 2.01 | 1.88E-02 |
| 202936_s_at | <a href="#">SOX9</a>     | SRY (sex determining region Y)-box 9                                          | 2.01 | 2.25E-02 |

| <b>6h GS-5759</b>   |                                 | <i>178 probe sets are listed corresponding to 134 DEGs</i>                                                |                    |                 |
|---------------------|---------------------------------|-----------------------------------------------------------------------------------------------------------|--------------------|-----------------|
| <b>Probe Set ID</b> | <b>Gene Symbol</b>              | <b>UniGene Name</b>                                                                                       | <b>Fold Change</b> | <b>P-Value</b>  |
| 218541_s_at         | <a href="#">C8orf4</a>          | chromosome 8 open reading frame 4                                                                         | 10.24              | 7.50E-05        |
| <b>221541_at</b>    | <b><a href="#">CRISPLD2</a></b> | <b>cysteine-rich secretory protein LCCL domain containing 2</b>                                           | <b>9.72</b>        | <b>9.60E-05</b> |
| 230189_x_at         | <a href="#">NSMF</a>            | NMDA receptor synaptonuclear signaling and neuronal migration factor                                      | 9.61               | 4.51E-02        |
| 209959_at           | <a href="#">NRA43</a>           | nuclear receptor subfamily 4, group A, member 3                                                           | 9.49               | 1.75E-03        |
| 1570422_at          | <a href="#">SNTG2</a>           | syntrophin, gamma 2                                                                                       | 8.93               | 4.44E-02        |
| 215912_at           | <a href="#">GNAO1</a>           | guanine nucleotide binding protein (G protein), alpha activating activity polypeptide O                   | 7.53               | 3.34E-02        |
| 219049_at           | <a href="#">CSGALNACT1</a>      | chondroitin sulfate N-acetylgalactosaminyltransferase 1                                                   | 7.49               | 3.10E-05        |
| 228128_x_at         | <a href="#">PAPPA</a>           | pregnancy-associated plasma protein A, pappalysin 1                                                       | 6.62               | 1.47E-04        |
| 231961_at           | <a href="#">RBPMS</a>           | RNA binding protein with multiple splicing                                                                | 6.62               | 1.04E-02        |
| 224941_at           | <a href="#">PAPPA</a>           | pregnancy-associated plasma protein A, pappalysin 1                                                       | 6.29               | 7.50E-05        |
| 1569693_at          | <a href="#">BTBD8</a>           | BTB (POZ) domain containing 8                                                                             | 6.16               | 3.93E-02        |
| 222784_at           | <a href="#">SMOC1</a>           | SPARC related modular calcium binding 1                                                                   | 6.14               | 8.75E-03        |
| 224940_s_at         | <a href="#">PAPPA</a>           | pregnancy-associated plasma protein A, pappalysin 1                                                       | 5.94               | 5.40E-05        |
| 224942_at           | <a href="#">PAPPA</a>           | pregnancy-associated plasma protein A, pappalysin 1                                                       | 5.84               | 2.70E-05        |
| 1558654_at          | <a href="#">PPM1H</a>           | protein phosphatase, Mg2+/Mn2+ dependent, 1H                                                              | 5.61               | 2.93E-02        |
| 243438_at           | <a href="#">PDE7B</a>           | phosphodiesterase 7B                                                                                      | 5.43               | 1.91E-04        |
| 244434_at           | <a href="#">GPR82</a>           | G protein-coupled receptor 82                                                                             | 5.42               | 1.05E-02        |
| 222783_s_at         | <a href="#">SMOC1</a>           | SPARC related modular calcium binding 1                                                                   | 5.20               | 9.77E-03        |
| 243275_at           | <a href="#">BMPR1A</a>          | bone morphogenetic protein receptor, type IA; similar to ALK-3                                            | 5.09               | 1.99E-02        |
| 239461_at           | <a href="#">GALNT15</a>         | UDP-N-acetyl-alpha-D-galactosamine:polypeptide N-acetylgalactosaminyltransferase 15                       | 4.93               | 8.45E-03        |
| 215382_x_at         | <a href="#">TPSAB1</a>          | trypsin alpha/beta 1                                                                                      | 4.81               | 1.58E-03        |
| 234129_at           | <a href="#">ARHGEF12</a>        | Rho guanine nucleotide exchange factor (GEF) 12                                                           | 4.78               | 3.85E-02        |
| 228962_at           | <a href="#">PDE4D</a>           | phosphodiesterase 4D, cAMP-specific                                                                       | 4.72               | 9.72E-03        |
| 216951_at           | <a href="#">FCGR1A</a>          | Fc fragment of IgG, high affinity Ia, receptor (CD64)                                                     | 4.67               | 1.22E-02        |
| 1564580_at          | <a href="#">DAB1</a>            | disabled homolog 1 (Drosophila)                                                                           | 4.62               | 1.91E-03        |
| 203549_s_at         | <a href="#">LPL</a>             | lipoprotein lipase                                                                                        | 4.61               | 8.52E-03        |
| 201981_at           | <a href="#">PAPPA</a>           | pregnancy-associated plasma protein A, pappalysin 1                                                       | 4.60               | 1.03E-04        |
| 230109_at           | <a href="#">PDE7B</a>           | phosphodiesterase 7B                                                                                      | 4.45               | 3.30E-05        |
| 203548_s_at         | <a href="#">LPL</a>             | lipoprotein lipase                                                                                        | 4.38               | 1.15E-02        |
| <b>216248_s_at</b>  | <b><a href="#">NR4A2</a></b>    | <b>nuclear receptor subfamily 4, group A, member 2</b>                                                    | <b>4.33</b>        | <b>1.10E-02</b> |
| 206519_x_at         | <a href="#">SIGLEC6</a>         | sialic acid binding Ig-like lectin 6                                                                      | 4.16               | 1.01E-02        |
| 238649_at           | <a href="#">PITPNC1</a>         | phosphatidylinositol transfer protein, cytoplasmic 1                                                      | 4.04               | 6.09E-04        |
| 1569262_x_at        | <a href="#">UBE3D</a>           | ubiquitin protein ligase E3D                                                                              | 3.95               | 4.50E-02        |
| 243273_at           | <a href="#">PPFIA2</a>          | protein tyrosine phosphatase, receptor type, f polypeptide (PTPRF), interacting protein (liprin), alpha 2 | 3.93               | 2.72E-02        |
| 234587_at           | <a href="#">IL1RAPL1</a>        | interleukin 1 receptor accessory protein-like 1                                                           | 3.90               | 2.84E-02        |
| 1553938_a_at        | <a href="#">STK32A</a>          | serine/threonine kinase 32A                                                                               | 3.89               | 1.45E-02        |
| 225516_at           | <a href="#">SLC7A2</a>          | solute carrier family 7 (cationic amino acid transporter, y+ system), member 2                            | 3.86               | 2.90E-05        |
| 228501_at           | <a href="#">GALNT15</a>         | UDP-N-acetyl-alpha-D-galactosamine:polypeptide N-acetylgalactosaminyltransferase 15                       | 3.72               | 4.80E-04        |
| <b>204621_s_at</b>  | <b><a href="#">NR4A2</a></b>    | <b>nuclear receptor subfamily 4, group A, member 2</b>                                                    | <b>3.72</b>        | <b>1.61E-02</b> |
| 233502_at           | <a href="#">CNTN3</a>           | contactin 3 (plasmacytoma associated)                                                                     | 3.70               | 1.50E-02        |
| 220461_at           | <a href="#">PCNXL2</a>          | pecanex-like 2 (Drosophila)                                                                               | 3.67               | 2.94E-02        |

|                    |                      |                                                                                             |             |                 |
|--------------------|----------------------|---------------------------------------------------------------------------------------------|-------------|-----------------|
| 237280_at          | <i>TCTE1</i>         | t-complex-associated-testis-expressed 1                                                     | 3.67        | 1.62E-02        |
| 216167_at          | <i>LRRN2</i>         | leucine rich repeat neuronal 2                                                              | 3.66        | 3.18E-02        |
| 208606_s_at        | <i>WNT4</i>          | wingless-type MMTV integration site family, member 4                                        | 3.59        | 6.95E-03        |
| 1557538_at         | <i>MED13L</i>        | mediator complex subunit 13-like                                                            | 3.51        | 3.80E-03        |
| 241119_at          | <i>ANGPT1</i>        | angiopoietin 1                                                                              | 3.50        | 3.15E-02        |
| 220190_s_at        | <i>GTF2A1L</i>       | general transcription factor IIA, 1-like                                                    | 3.49        | 1.97E-02        |
| 236361_at          | <i>GALNT15</i>       | UDP-N-acetyl-alpha-D-galactosamine:polypeptide N-acetylgalactosaminyltransferase 15         | 3.46        | 9.98E-04        |
| 229709_at          | <i>ATP1B3</i>        | ATPase, Na+/K+ transporting, beta 3 polypeptide                                             | 3.45        | 5.02E-03        |
| 239622_at          | <i>TRAP1</i>         | TNF receptor-associated protein 1                                                           | 3.43        | 4.55E-02        |
| 219093_at          | <i>PID1</i>          | phosphotyrosine interaction domain containing 1                                             | 3.42        | 1.12E-02        |
| <b>204622_x_at</b> | <b><i>NR4A2</i></b>  | <b>nuclear receptor subfamily 4, group A, member 2</b>                                      | <b>3.34</b> | <b>1.42E-02</b> |
| 225987_at          | <i>STEAP4</i>        | STEAP family member 4                                                                       | 3.34        | 4.29E-04        |
| 204491_at          | <i>PDE4D</i>         | phosphodiesterase 4D, cAMP-specific                                                         | 3.27        | 2.31E-03        |
| 220187_at          | <i>STEAP4</i>        | STEAP family member 4                                                                       | 3.26        | 4.30E-05        |
| 1553199_at         | <i>DCAF4L2</i>       | DDB1 and CUL4 associated factor 4-like 2                                                    | 3.23        | 6.81E-03        |
| <b>213182_x_at</b> | <b><i>CDKN1C</i></b> | <b>cyclin-dependent kinase inhibitor 1C (p57, Kip2)</b>                                     | <b>3.14</b> | <b>4.60E-02</b> |
| 1569850_at         | <i>LPHN2</i>         | latrophilin 2                                                                               | 3.14        | 4.59E-02        |
| 224098_at          | <i>ABAT</i>          | 4-aminobutyrate aminotransferase                                                            | 3.13        | 1.70E-03        |
| 224071_at          | <i>IL20</i>          | interleukin 20                                                                              | 3.05        | 1.13E-02        |
| 205501_at          | <i>PDE10A</i>        | phosphodiesterase 10A                                                                       | 3.04        | 4.61E-04        |
| 228507_at          | <i>PDE3A</i>         | phosphodiesterase 3A, cGMP-inhibited                                                        | 3.03        | 1.95E-02        |
| 1560516_at         | <i>TMEM26</i>        | transmembrane protein 26                                                                    | 2.95        | 3.82E-02        |
| 210982_s_at        | <i>HLA-DRA</i>       | major histocompatibility complex, class II, DR alpha                                        | 2.93        | 1.17E-02        |
| 239650_at          | <i>NCKAP5</i>        | NCK-associated protein 5                                                                    | 2.93        | 4.34E-03        |
| 207038_at          | <i>SLC16A6</i>       | solute carrier family 16, member 6 (monocarboxylic acid transporter 7)                      | 2.92        | 8.09E-03        |
| <b>216894_x_at</b> | <b><i>CDKN1C</i></b> | <b>cyclin-dependent kinase inhibitor 1C (p57, Kip2)</b>                                     | <b>2.89</b> | <b>4.93E-02</b> |
| 1555585_a_at       | <i>FAM71B</i>        | family with sequence similarity 71, member B                                                | 2.89        | 4.47E-04        |
| 220540_at          | <i>KCNK15</i>        | potassium channel, subfamily K, member 15                                                   | 2.86        | 8.51E-04        |
| 37020_at           | <i>CRP</i>           | C-reactive protein, pentraxin-related                                                       | 2.83        | 3.21E-02        |
| 236300_at          | <i>PDE3A</i>         | phosphodiesterase 3A, cGMP-inhibited                                                        | 2.83        | 1.64E-02        |
| 207768_at          | <i>EGR4</i>          | early growth response 4                                                                     | 2.80        | 2.31E-02        |
| 237939_at          | <i>EPHA5</i>         | EPH receptor A5                                                                             | 2.79        | 2.00E-05        |
| 241404_at          | <i>EPHA5</i>         | EPH receptor A5                                                                             | 2.79        | 7.38E-03        |
| <b>213348_at</b>   | <b><i>CDKN1C</i></b> | <b>cyclin-dependent kinase inhibitor 1C (p57, Kip2)</b>                                     | <b>2.78</b> | <b>4.71E-02</b> |
| 244272_s_at        | <i>TC2N</i>          | tandem C2 domains, nuclear                                                                  | 2.74        | 2.92E-02        |
| 216627_s_at        | <i>B4GALT1</i>       | UDP-Gal:betaGlcNAc beta 1,4-galactosyltransferase, polypeptide 1                            | 2.73        | 6.56E-04        |
| 210836_x_at        | <i>PDE4D</i>         | phosphodiesterase 4D, cAMP-specific                                                         | 2.73        | 6.57E-03        |
| 226913_s_at        | <i>SOX8</i>          | SRY (sex determining region Y)-box 8                                                        | 2.73        | 3.23E-02        |
| 231773_at          | <i>ANGPTL1</i>       | angiopoietin-like 1                                                                         | 2.71        | 1.48E-03        |
| <b>213183_s_at</b> | <b><i>CDKN1C</i></b> | <b>cyclin-dependent kinase inhibitor 1C (p57, Kip2)</b>                                     | <b>2.70</b> | <b>4.80E-02</b> |
| 242202_at          | <i>INTS4</i>         | integrator complex subunit 4                                                                | 2.69        | 1.01E-02        |
| 206389_s_at        | <i>PDE3A</i>         | phosphodiesterase 3A, cGMP-inhibited                                                        | 2.68        | 2.70E-02        |
| 220492_s_at        | <i>OTOF</i>          | otoferlin                                                                                   | 2.67        | 1.56E-02        |
| 210837_s_at        | <i>PDE4D</i>         | phosphodiesterase 4D, cAMP-specific                                                         | 2.66        | 4.04E-03        |
| 230748_at          | <i>SLC16A6</i>       | solute carrier family 16, member 6 (monocarboxylic acid transporter 7)                      | 2.66        | 5.40E-03        |
| 230714_s_at        | <i>UBE2S</i>         | ubiquitin-conjugating enzyme E2S                                                            | 2.66        | 7.44E-03        |
| 1558489_at         | <i>RCL1</i>          | RNA terminal phosphate cyclase-like 1                                                       | 2.65        | 9.33E-03        |
| 235770_at          | <i>MASP1</i>         | mannan-binding lectin serine peptidase 1 (C4/C2 activating component of Ra-reactive factor) | 2.64        | 2.21E-02        |
| <b>220088_at</b>   | <b><i>CSAR1</i></b>  | <b>complement component 5a receptor 1</b>                                                   | <b>2.63</b> | <b>2.50E-03</b> |
| 1555006_at         | <i>WDR66</i>         | WD repeat domain 66                                                                         | 2.59        | 3.55E-02        |
| <b>209583_s_at</b> | <b><i>CD200</i></b>  | <b>CD200 molecule</b>                                                                       | <b>2.58</b> | <b>2.01E-02</b> |
| 217201_at          | <i>RASAL2</i>        | RAS protein activator like 2                                                                | 2.58        | 3.90E-02        |
| 208425_s_at        | <i>TANC2</i>         | tetratricopeptide repeat, ankyrin repeat and coiled-coil containing 2                       | 2.58        | 2.03E-03        |
| 206947_at          | <i>B3GALT5</i>       | UDP-Gal:betaGlcNAc beta 1,3-galactosyltransferase, polypeptide 5                            | 2.57        | 3.34E-02        |
| 1560172_at         | <i>INTS10</i>        | integrator complex subunit 10                                                               | 2.55        | 5.15E-03        |
| 218177_at          | <i>CHMP1B</i>        | charged multivesicular body protein 1B                                                      | 2.54        | 2.37E-03        |
| 207626_s_at        | <i>SLC7A2</i>        | solute carrier family 7 (cationic amino acid transporter, y+ system), member 2              | 2.53        | 3.71E-04        |
| 225801_at          | <i>FBXO32</i>        | F-box protein 32                                                                            | 2.51        | 1.40E-03        |
| <b>209582_s_at</b> | <b><i>CD200</i></b>  | <b>CD200 molecule</b>                                                                       | <b>2.50</b> | <b>1.82E-02</b> |
| 1552993_at         | <i>DYDC1</i>         | DPY30 domain containing 1                                                                   | 2.50        | 3.90E-02        |
| 222015_at          | <i>CSNK1E</i>        | casein kinase 1, epsilon                                                                    | 2.48        | 4.80E-05        |
| 229552_at          | <i>HRK</i>           | harakiri, BCL2 interacting protein (contains only BH3 domain)                               | 2.48        | 3.90E-02        |
| 1566931_at         | <i>TFB2M</i>         | transcription factor B2, mitochondrial                                                      | 2.48        | 4.00E-02        |
| 223484_at          | <i>C15orf48</i>      | chromosome 15 open reading frame 48                                                         | 2.47        | 1.54E-02        |
| 1558387_at         | <i>NKAIN3</i>        | Na+/K+ Transporting ATPase interacting 3                                                    | 2.47        | 1.33E-02        |
| 216289_at          | <i>GPR144</i>        | G protein-coupled receptor 144                                                              | 2.46        | 2.03E-02        |
| 240362_at          | <i>MPC1</i>          | mitochondrial pyruvate carrier 1                                                            | 2.46        | 1.68E-02        |
| 213006_at          | <i>CEBPD</i>         | CCAAT/enhancer binding protein (C/EBP), delta                                               | 2.44        | 7.78E-03        |
| 1555994_at         | <i>DIAPH3-AS1</i>    | DIAPH3 antisense RNA 1                                                                      | 2.44        | 3.03E-02        |
| 238919_at          | <i>PCDH9</i>         | protocadherin 9                                                                             | 2.44        | 2.91E-02        |
| 208078_s_at        | <i>SIK1</i>          | salt-inducible kinase 1                                                                     | 2.44        | 1.17E-02        |
| 208400_at          | <i>GLP1R</i>         | glucagon-like peptide 1 receptor                                                            | 2.43        | 1.92E-03        |
| <b>227697_at</b>   | <b><i>SQCS3</i></b>  | <b>suppressor of cytokine signaling 3</b>                                                   | <b>2.41</b> | <b>8.20E-03</b> |
| 227173_s_at        | <i>BACH2</i>         | BTB and CNC homology 1, basic leucine zipper transcription factor 2                         | 2.38        | 2.13E-02        |
| 1555007_s_at       | <i>WDR66</i>         | WD repeat domain 66                                                                         | 2.38        | 3.18E-02        |
| 228132_at          | <i>ABLIM2</i>        | actin binding LIM protein family, member 2                                                  | 2.37        | 7.86E-03        |
| 203628_at          | <i>IGF1R</i>         | insulin-like growth factor 1 receptor                                                       | 2.35        | 1.05E-04        |

|              |                       |                                                                                                            |      |          |
|--------------|-----------------------|------------------------------------------------------------------------------------------------------------|------|----------|
| 201810_s_at  | <i>SH3BP5</i>         | SH3-domain binding protein 5 (BTK-associated)                                                              | 2.35 | 2.90E-04 |
| 236610_at    | <i>PDE4D</i>          | phosphodiesterase 4D, cAMP-specific (phosphodiesterase E3 dunce homolog, Drosophila)                       | 2.34 | 4.56E-02 |
| 228964_at    | <i>PRDM1</i>          | PR domain containing 1, with ZNF domain                                                                    | 2.34 | 3.46E-02 |
| 209772_s_at  | <i>CD24</i>           | CD24 molecule                                                                                              | 2.31 | 3.20E-02 |
| 235367_at    | <i>MYPN</i>           | myopalladin                                                                                                | 2.31 | 7.22E-03 |
| 1552736_a_at | <i>NETO1</i>          | neuropilin (NRP) and tolloid (TLL)-like 1                                                                  | 2.30 | 1.14E-02 |
| 230439_at    | <i>RBAK</i>           | RB-associated KRAB zinc finger                                                                             | 2.29 | 4.37E-02 |
| 228325_at    | <i>SPDR</i>           | scaffolding Protein Involved In DNA Repair                                                                 | 2.29 | 3.62E-03 |
| 211631_x_at  | <i>B4GALT1</i>        | UDP-Gal:betaGlcNAc beta 1,4- galactosyltransferase, polypeptide 1                                          | 2.25 | 5.42E-04 |
| 221140_s_at  | <i>GPR132</i>         | G protein-coupled receptor 132                                                                             | 2.25 | 1.02E-03 |
| 238029_s_at  | <i>SLC16A14</i>       | solute carrier family 16, member 14 (monocarboxylic acid transporter 14)                                   | 2.24 | 1.03E-03 |
| 229414_at    | <i>PITPNC1</i>        | phosphatidylinositol transfer protein, cytoplasmic 1                                                       | 2.22 | 8.71E-03 |
| 225978_at    | <i>RIMKLB</i>         | ribosomal modification protein rimK-like family member B                                                   | 2.22 | 1.25E-03 |
| 232470_at    | <i>SIK1</i>           | salt-inducible kinase 1                                                                                    | 2.21 | 2.52E-02 |
| 235650_at    | <i>CDHR3</i>          | cadherin-related family member 3                                                                           | 2.20 | 2.80E-02 |
| 218865_at    | <i>MARC1</i>          | mitochondrial amidoxime reducing component 1                                                               | 2.19 | 3.36E-03 |
| 203627_at    | <i>IGF1R</i>          | insulin-like growth factor 1 receptor                                                                      | 2.17 | 1.68E-03 |
| 1558552_s_at | <i>C3orf55</i>        | chromosome 3 open reading frame 55                                                                         | 2.16 | 2.40E-02 |
| 208651_x_at  | <i>CD24</i>           | CD24 molecule                                                                                              | 2.16 | 2.95E-02 |
| 226858_at    | <i>CSNK1E</i>         | casein kinase 1, epsilon                                                                                   | 2.16 | 2.02E-04 |
| 236440_at    | <i>NETO1</i>          | neuropilin (NRP) and tolloid (TLL)-like 1                                                                  | 2.16 | 2.23E-02 |
| 224952_at    | <i>TANC2</i>          | tetratricopeptide repeat, ankyrin repeat and coiled-coil containing 2                                      | 2.16 | 2.13E-03 |
| 231367_s_at  | <i>FNDC3A</i>         | fibronectin type III domain containing 3A                                                                  | 2.14 | 3.42E-03 |
| 225999_at    | <i>RIMKLB</i>         | ribosomal modification protein rimK-like family member B                                                   | 2.14 | 8.04E-03 |
| 206616_s_at  | <i>ADAM22</i>         | ADAM metallopeptidase domain 22                                                                            | 2.13 | 3.09E-03 |
| 213436_at    | <i>CNR1</i>           | cannabinoid receptor 1 (brain)                                                                             | 2.12 | 1.49E-03 |
| 241717_at    | <i>MOBP</i>           | myelin-associated oligodendrocyte basic protein                                                            | 2.12 | 4.84E-03 |
| 1564022_at   | <i>ZNF804B</i>        | zinc finger protein 804B                                                                                   | 2.12 | 2.43E-02 |
| 208650_s_at  | <i>CD24</i>           | CD24 molecule                                                                                              | 2.11 | 3.48E-02 |
| 220335_x_at  | <i>CES3</i>           | carboxylesterase 3                                                                                         | 2.11 | 2.99E-02 |
| 238455_at    | <i>PLXDC2</i>         | plexin domain containing 2                                                                                 | 2.11 | 7.15E-03 |
| 207864_at    | <i>SCN7A</i>          | sodium channel, voltage-gated, type VII, alpha subunit                                                     | 2.11 | 2.65E-02 |
| 205896_at    | <i>SLC22A4</i>        | solute carrier family 22 (organic cation/ergothioneine transporter), member 4                              | 2.11 | 8.33E-03 |
| 200731_s_at  | <i>PTP4A1</i>         | protein tyrosine phosphatase type IVA, member 1                                                            | 2.10 | 4.14E-03 |
| 218723_s_at  | <i>RGCC</i>           | regulator of cell cycle                                                                                    | 2.10 | 1.49E-02 |
| 220006_at    | <i>EFCC1</i>          | EF-hand and coiled-coil domain containing 1                                                                | 2.09 | 3.51E-02 |
| 206864_s_at  | <i>HRK</i>            | harakiri, BCL2 interacting protein (contains only BH3 domain)                                              | 2.08 | 2.61E-02 |
| 219155_at    | <i>PITPNC1</i>        | phosphatidylinositol transfer protein, cytoplasmic 1                                                       | 2.08 | 1.17E-02 |
| 221305_s_at  | <i>UGT1A8; UGT1A9</i> | UDP glucuronosyltransferase 1 family, polypeptide A8; UDP glucuronosyltransferase 1 family, polypeptide A9 | 2.08 | 1.66E-03 |
| 1568949_at   | <i>PITPNC1</i>        | phosphatidylinositol transfer protein, cytoplasmic 1                                                       | 2.07 | 9.42E-03 |
| 236297_at    | <i>C10orf112</i>      | chromosome 10 open reading frame 112                                                                       | 2.06 | 5.55E-03 |
| 1564690_at   | <i>C9orf41</i>        | chromosome 9 open reading frame 41                                                                         | 2.06 | 3.20E-02 |
| 206633_at    | <i>CHRNA1</i>         | cholinergic receptor, nicotinic, alpha 1 (muscle)                                                          | 2.06 | 4.29E-02 |
| 206915_at    | <i>NKX2-2</i>         | NK2 homeobox 2                                                                                             | 2.06 | 3.80E-03 |
| 207978_s_at  | <i>NR4A3</i>          | nuclear receptor subfamily 4, group A, member 3                                                            | 2.06 | 1.91E-02 |
| 211274_at    | <i>TBX1</i>           | T-box 1                                                                                                    | 2.06 | 3.90E-02 |
| 224917_at    | <i>MIR21</i>          | microRNA 21                                                                                                | 2.05 | 4.12E-02 |
| 206388_at    | <i>PDE3A</i>          | phosphodiesterase 3A, cGMP-inhibited                                                                       | 2.05 | 7.39E-03 |
| 205092_x_at  | <i>ZBTB1</i>          | zinc finger and BTB domain containing 1                                                                    | 2.05 | 5.11E-03 |
| 202238_s_at  | <i>NNMT</i>           | nicotinamide N-methyltransferase                                                                           | 2.04 | 7.08E-04 |
| 266_s_at     | <i>CD24</i>           | CD24 molecule                                                                                              | 2.03 | 4.53E-02 |
| 242659_at    | <i>ELF4</i>           | E74-like factor 4 (ets domain transcription factor)                                                        | 2.03 | 2.46E-02 |
| 220343_at    | <i>PDE7B</i>          | phosphodiesterase 7B                                                                                       | 2.03 | 1.03E-04 |
| 236348_at    | <i>TMEM176B</i>       | transmembrane protein 176B                                                                                 | 2.03 | 1.14E-02 |
| 1552325_at   | <i>CCDC11</i>         | coiled-coil domain containing 11                                                                           | 2.02 | 1.50E-02 |
| 214292_at    | <i>ITGB4</i>          | integrin, beta 4                                                                                           | 2.02 | 3.06E-03 |
| 1561654_at   | <i>LIMK2</i>          | LIM domain kinase 2                                                                                        | 2.02 | 2.94E-02 |
| 228748_at    | <i>CD59</i>           | CD59 molecule, complement regulatory protein                                                               | 2.01 | 2.44E-03 |
| 240709_at    | <i>SEZ6L</i>          | seizure related 6 homolog (mouse)-like                                                                     | 2.01 | 1.56E-03 |
| 224963_at    | <i>SLC26A2</i>        | solute carrier family 26 (sulfate transporter), member 2                                                   | 2.01 | 2.66E-03 |

| <b>18h GS-5759</b>  |                    | <i>75 probe sets are listed corresponding to 75 DEGs</i>              |                    |                |
|---------------------|--------------------|-----------------------------------------------------------------------|--------------------|----------------|
| <b>Probe Set ID</b> | <b>Gene Symbol</b> | <b>UniGene Name</b>                                                   | <b>Fold Change</b> | <b>P-Value</b> |
| 233973_at           | <i>LYZL1</i>       | lysozyme-like 1                                                       | 10.64              | 7.35E-03       |
| 220645_at           | <i>NXPE4</i>       | neurexophilin and PC-esterase domain family, member 4                 | 10.43              | 4.15E-02       |
| 216122_at           | <i>NAV1</i>        | neuron navigator 1                                                    | 8.23               | 1.27E-02       |
| 220065_at           | <i>TNMD</i>        | tenomodulin                                                           | 6.60               | 1.39E-04       |
| 231799_at           | <i>TANC2</i>       | tetratricopeptide repeat, ankyrin repeat and coiled-coil containing 2 | 5.07               | 4.67E-02       |
| 239931_at           | <i>MYC</i>         | v-myc myelocytomatosis viral oncogene homolog (avian)                 | 4.81               | 2.67E-02       |
| 1553573_s_at        | <i>EFNA2</i>       | ephrin-A2                                                             | 4.60               | 5.28E-04       |
| 231667_at           | <i>SLC39A5</i>     | solute carrier family 39 (metal ion transporter), member 5            | 4.58               | 3.95E-02       |
| 236028_at           | <i>IBSP</i>        | integrin-binding sialoprotein                                         | 4.57               | 3.70E-03       |

|              |                           |                                                                                                 |      |          |
|--------------|---------------------------|-------------------------------------------------------------------------------------------------|------|----------|
| 231336_at    | <u>CPNE4</u>              | copine IV                                                                                       | 4.38 | 4.09E-02 |
| 242952_at    | <u>HDAC9</u>              | histone deacetylase 9                                                                           | 4.32 | 3.63E-02 |
| 217417_at    | <u>MYO5A</u>              | myosin VA (heavy chain 12, myosin)                                                              | 4.08 | 1.44E-02 |
| 240093_x_at  | <u>GOLSYN</u>             | Golgi-localized protein                                                                         | 3.87 | 1.26E-03 |
| 241369_at    | <u>ADAMTS9</u>            | ADAM metalloproteinase with thrombospondin type 1 motif, 9                                      | 3.72 | 2.21E-02 |
| 243167_at    | <u>ABCB5</u>              | ATP-binding cassette, sub-family B (MDR/TAP), member 5                                          | 3.71 | 3.76E-02 |
| 1553355_at   | <u>TMPRSS6</u>            | transmembrane protease, serine 6                                                                | 3.51 | 5.07E-03 |
| 216167_at    | <u>LRRN2</u>              | leucine rich repeat neuronal 2                                                                  | 3.44 | 1.42E-02 |
| 207523_at    | <u>C6orf10</u>            | chromosome 6 open reading frame 10                                                              | 3.41 | 3.94E-02 |
| 240679_at    | <u>STK32B</u>             | serine/threonine kinase 32B                                                                     | 3.10 | 4.22E-02 |
| 214770_at    | <u>MSR1</u>               | macrophage scavenger receptor 1                                                                 | 3.05 | 4.43E-02 |
| 1560642_at   | <u>ESPN</u>               | espin                                                                                           | 3.00 | 4.40E-05 |
| 1568902_at   | <u>ARL8A</u>              | ADP-ribosylation factor-like 8A                                                                 | 2.92 | 3.85E-02 |
| 214122_at    | <u>PDLIM7</u>             | PDZ and LIM domain 7 (enigma)                                                                   | 2.86 | 4.12E-02 |
| 239183_at    | <u>ANGPTL1</u>            | angiopoietin-like 1                                                                             | 2.85 | 2.60E-02 |
| 209480_at    | <u>HLA-DQB1</u>           | major histocompatibility complex, class II, DQ beta 1                                           | 2.82 | 1.26E-02 |
| 237720_at    | <u>ASB4</u>               | ankyrin repeat and SOCS box containing 4                                                        | 2.79 | 1.22E-03 |
| 215593_at    | <u>GCNT2</u>              | glucosaminyl (N-acetyl) transferase 2, l-branching enzyme (I blood group)                       | 2.78 | 2.83E-02 |
| 236735_at    | <u>C3orf63</u>            | chromosome 3 open reading frame 63                                                              | 2.76 | 3.57E-02 |
| 220394_at    | <u>FGF20</u>              | fibroblast growth factor 20                                                                     | 2.73 | 2.30E-02 |
| 237328_at    | <u>C14orf105</u>          | chromosome 14 open reading frame 105                                                            | 2.71 | 2.88E-03 |
| 215612_at    | <u>TBC1D5</u>             | TBC1 domain family, member 5                                                                    | 2.69 | 2.86E-02 |
| 207599_at    | <u>MMP20</u>              | matrix metalloproteinase 20                                                                     | 2.68 | 3.27E-02 |
| 230061_at    | <u>TM4SF18</u>            | transmembrane 4 L six family member 18                                                          | 2.68 | 4.55E-02 |
| 1561280_at   | <u>LEMD1-AS1</u>          | LEMD1 antisense RNA 1                                                                           | 2.57 | 2.90E-03 |
| 1558452_at   | <u>TMEM144</u>            | transmembrane protein 144                                                                       | 2.54 | 1.34E-03 |
| 220899_at    | <u>COPG2</u>              | coatamer protein complex, subunit gamma 2                                                       | 2.49 | 1.12E-02 |
| 215853_at    | <u>SDCCAG8</u>            | serologically defined colon cancer antigen 8                                                    | 2.45 | 1.56E-03 |
| 223524_s_at  | <u>TMEM108</u>            | transmembrane protein 108                                                                       | 2.45 | 2.73E-02 |
| 214206_at    | <u>PP1L6</u>              | peptidylprolyl isomerase (cyclophilin)-like 6                                                   | 2.42 | 8.64E-04 |
| 241839_at    | <u>DLG3-AS1</u>           | DLG3 antisense RNA 1; NULL                                                                      | 2.41 | 1.67E-02 |
| 1569570_at   | <u>AGBL4</u>              | ATP/GTP binding protein-like 4                                                                  | 2.39 | 4.62E-02 |
| 1566948_at   | <u>DLG2</u>               | discs, large homolog 2 (Drosophila)                                                             | 2.39 | 3.73E-02 |
| 1566284_at   | <u>REV3L</u>              | REV3-like, catalytic subunit of DNA polymerase zeta (yeast)                                     | 2.36 | 3.27E-02 |
| 240388_at    | <u>KRT27</u>              | keratin 27                                                                                      | 2.33 | 2.42E-02 |
| 234772_s_at  | <u>KRTAP2-1; KRTAP2-2</u> | keratin associated protein 2-1; keratin associated protein 2-2                                  | 2.32 | 4.08E-02 |
| 243003_at    | <u>MLLT10</u>             | myeloid/lymphoid or mixed-lineage leukemia (trithorax homolog, Drosophila); translocated to, 10 | 2.30 | 2.30E-02 |
| 232578_at    | <u>CLDN18</u>             | claudin 18                                                                                      | 2.29 | 4.59E-02 |
| 240839_at    | <u>MAU2</u>               | MAU2 sister chromatid cohesion factor                                                           | 2.29 | 2.20E-02 |
| 1553765_a_at | <u>KLHL32</u>             | kelch-like family member 32                                                                     | 2.28 | 2.93E-02 |
| 241518_at    | <u>HTR2C</u>              | 5-hydroxytryptamine (serotonin) receptor 2C                                                     | 2.26 | 1.91E-02 |
| 241509_at    | <u>PLEKHA5</u>            | pleckstrin homology domain containing, family A member 5                                        | 2.26 | 4.37E-02 |
| 209855_s_at  | <u>KLK2</u>               | kallikrein-related peptidase 2                                                                  | 2.24 | 1.54E-02 |
| 1553905_at   | <u>CXorf22</u>            | chromosome X open reading frame 22                                                              | 2.22 | 2.44E-02 |
| 1569978_x_at | <u>GPR172A</u>            | G protein-coupled receptor 172A                                                                 | 2.22 | 1.99E-02 |
| 241026_at    | <u>ADAM12</u>             | ADAM metalloproteinase domain 12                                                                | 2.19 | 4.49E-02 |
| 239608_at    | <u>LPCAT4</u>             | lysophosphatidylcholine acyltransferase 4                                                       | 2.19 | 3.48E-03 |
| 239530_at    | <u>ADD2</u>               | adducin 2 (beta)                                                                                | 2.18 | 2.79E-03 |
| 1562573_at   | <u>CYP17A1</u>            | cytochrome P450, family 17, subfamily A, polypeptide 1                                          | 2.18 | 4.31E-02 |
| 220224_at    | <u>HAO1</u>               | hydroxyacid oxidase (glycolate oxidase) 1                                                       | 2.16 | 4.91E-02 |
| 211154_at    | <u>THPO</u>               | thrombopoietin                                                                                  | 2.16 | 3.26E-02 |
| 207848_at    | <u>AVP</u>                | arginine vasopressin                                                                            | 2.15 | 4.12E-02 |
| 1557057_a_at | <u>C5orf47</u>            | chromosome 5 open reading frame 47                                                              | 2.15 | 1.21E-02 |
| 216502_at    | <u>ISG20L2</u>            | interferon stimulated exonuclease gene 20kDa-like 2                                             | 2.13 | 2.07E-02 |
| 1563040_s_at | <u>LARGE-AS1</u>          | LARGE antisense RNA 1                                                                           | 2.13 | 3.62E-03 |
| 239328_at    | <u>RCS1</u>               | RCS1 domain containing 1                                                                        | 2.12 | 7.03E-03 |
| 220006_at    | <u>EFCC1</u>              | EF-hand and coiled-coil domain containing 1                                                     | 2.10 | 1.79E-03 |
| 220540_at    | <u>KCNK15</u>             | potassium channel, subfamily K, member 15                                                       | 2.10 | 1.11E-02 |
| 1552675_at   | <u>DNAJB7</u>             | DnaJ (Hsp40) homolog, subfamily B, member 7                                                     | 2.09 | 2.71E-02 |
| 233884_at    | <u>HIVEP3</u>             | human immunodeficiency virus type I enhancer binding protein 3                                  | 2.09 | 3.10E-02 |
| 220626_at    | <u>SERPINA10</u>          | serpin peptidase inhibitor, clade A (alpha-1 antitrypsin, antitrypsin), member 10               | 2.07 | 3.45E-02 |
| 1569461_at   | <u>KCNT1</u>              | potassium channel, subfamily T, member 1                                                        | 2.06 | 1.92E-02 |
| 240254_at    | <u>TNIK</u>               | TRAF2 and NCK interacting kinase                                                                | 2.06 | 3.66E-02 |
| 215784_at    | <u>CD1E</u>               | CD1e molecule                                                                                   | 2.01 | 3.82E-02 |
| 207393_at    | <u>HCRTR2</u>             | hypocretin (orexin) receptor 2                                                                  | 2.01 | 1.02E-02 |
| 232992_at    | <u>SAYS1</u>              | SAYS1 motif domain containing 1                                                                 | 2.01 | 4.01E-02 |

Transcripts used for RT-PCR validation are bolded and underlined.
